# Supplementary material for: Tail Wags Dog’s SINE: Retropositional Mechanisms of Can SINE Depend on Its A-Tail Structure
Source: MDPI journal article supplement (doi:10.3390/biology11101403), 2022-09-26
Supplement: s1 [file s1]

```

chr29 Can : -----TTTATATCAGGATATAATGGGGATCCCTGGGTGGCGCAGCGGTTTGGCGCCTGCCTTTGGCCCAGGGCGCGATCC
s_CM021973.1:11564704 : GGTTTTTTTGCTGTGGGAGAAAATGTTTTAAGATTCTCCATTGCTGGGATCCCTGGGTGGCGCAGCGGTTTGGCGCCTGCCTTTGGCCCAGGGCGCGATCC
d_CM016580.1:11386360 : GGTTTTTTTGCTGTGGGAGAAAATGTTTTAAGATTCTCCATTGCTGGGATCCCTGGGTGGCGCAGCGGTTTGGCGCCTGCCTTTGGCCCAGGGCGCGATCC
b_CM000012.4:11404058 : GGTTTTTTTGCTGTGGGAGAAAATGTTTTAAGATTCTCCATTGCTGGGATCCCTGGGTGGCGCAGCGGTTTGGCGCCTGCCTTTGGCCCAGGGCGCGATCC
b_CM000029.4:16380901 : TTATATTTATTTTACCAGATTGTTTTTATATCAGGATATAATGGGGATCCCTGGGTGGCGCAGCGGTTTGGCGCCTGCCTTTGGCCCAGGGCGCGATCC
s_CM021990.1:16532681 : TTATATTTATTTTACCAGATTGTTTTTATATCAGGATATAATGGGGATCCCTGGGTGGCGCAGCGGTTTGGCGCCTGCCTTTGGCCCAGGGCGCGATCC
d_CM016577.1:13904421 : CACAGTTTCACTTGTTGGGTTTTTGAATTTAAAACTAGGAAGAAAGGGATCCCTGGGTGGCGCAGCGGTTTGGCGCCTGCCTTTGGCCCAGGGCGCGATCC
s_CM021965.1:28875877 : TTCTTTATAGTATAGTTTAAAAATATTGAAAAAAGGATCCCTGGGTGGCGCAGCGGTTTGGCGCCTGCCTTTGGCCCAGGGCGCGATCC
d_CM016572.1:28320367 : TGTTCTTTTATAGTATAGTTTAAAAATATTGAAAAAAGGATCCCTGGGTGGCGCAGCGGTTTGGCGCCTGCCTTTGGCCCAGGGCGCGATCC
b_CM000004.4:28272540 : TGTTCTTTTATAGTATAGTTTAAAAATATTGAAAAAAGGATCCCTGGGTGGCGCAGCGGTTTGGCGCCTGCCTTTGGCCCAGGGCGCGATCC
s_CM021995.1:29864792 : GGAATTCATTGATGTTGAAGACTCTTTAGAAAACTGAATAGAGGATCCCTGGGTGGCGCAGCGGTTTGGCGCCTGCCTTTGGCCCAGGGCGCGATCC
b_CM000034.4:38698570 : GGAATTCATTGATGTTGAAGACTCTTTAGAAAACTGAATAGAGGATCCCTGGGTGGCGCAGCGGTTTGGCGCCTGCCTTTGGCCCAGGGCGCGATCC
d_CM016602.1:29638837 : GGAATTCATTGATGTTGAAGACTCTTTAGAAAACTGAATAGAGGATCCCTGGGTGGCGCAGCGGTTTGGCGCCTGCCTTTGGCCCAGGGCGCGATCC
s_CM021979.1:45176522 : GTCTCTCATGAATAAAATAAAATCTTAAAAAGAGGAAAGAGGATCCCTGGGTGGCGCAGCGGTTTGGCGCCTGCCTTTGGCCCAGGGCGCGATCC
s_CM021973.1:55357485 : GAAATATCAGTAGTATTAGTAGATTGTTTAAAGAGTTGAATACTGGGATCCCTGGGTGGCGCAGCGGTTTGGCGCCTGCCTTTGGCCCAGGGCGCGATCC
d_CM016580.1:55248210 : GAAATATCAGTAGTATTAGTAGATTGTTTAAAGAGTTGAATACTGGGATCCCTGGGTGGCGCAGCGGTTTGGCGCCTGCCTTTGGCCCAGGGCGCGATCC
b_CM000012.4:54909836 : GAAATATCAGTAGTATTAGTAGATTGTTTAAAGAGTTGAATACTGGGATCCCTGGGTGGCGCAGCGGTTTGGCGCCTGCCTTTGGCCCAGGGCGCGATCC
s_CM021976.1:36514210 : TTTTCATCCAGGTGGTAGAGAAGGAGACTTAAAAAGTCTAAACTCAGGATCCCTGGGTGGCGCAGCGGTTTGGCGCCTGCCTTTGGCCCAGGGCGCGATCC
b_CM000015.4:36603774 : TTTTCATCCAGGTGGTAGAGAAGGAGACTTAAAAAGTCTAAACTCAGGATCCCTGGGTGGCGCAGCGGTTTGGCGCCTGCCTTTGGCCCAGGGCGCGATCC
s_CM021987.1:29177051 : CAGAAAAGGTGTTCCCTTTTCAAAATGGAAGAAAAAACAATAGGGGATCCCTGGGTGGCGCAGCGGTTTGGCGCCTGCCTTTGGCCCAGGGCGCGATCC
b_CM000026.4:28974192 : CAGAAAAGGTGTTCCCTTTTCAAAATGGAAGAAAAAACAATAGGGGATCCCTGGGTGGCGCAGCGGTTTGGCGCCTGCCTTTGGCCCAGGGCGCGATCC
s_CM021992.1:39506440 : CAACACCCAGGAAATGAACAATCCAGTCAAGAAATGGGCAGAAGGGGATCCCTGGGTGGCGCAGCGGTTTGGCGCCTGCCTTTGGCCCAGGGCGCGATCC
d_CM016599.1:39027764 : CAACACCCAGGAAATGAACAATCCAGTCAAGAAATGGGCAGAAGGGGATCCCTGGGTGGCGCAGCGGTTTGGCGCCTGCCTTTGGCCCAGGGCGCGATCC
b_CM000031.4:38752766 : CAACACCCAGGAAATGAACAATCCAGTCAAGAAATGGGCAGAAGGGGATCCCTGGGTGGCGCAGCGGTTTGGCGCCTGCCTTTGGCCCAGGGCGCGATCC
d_CM016588.1:3987471 : CAATTTACACGTTTAAATGCAATCCCTATCAAAATACCATGGACTGGGATCCCTGGGTGGCGCAGCGGTTTGGCGCCTGCCTTTGGCCCAGGGCGCGATCC
s_CM021995.1:14669264 : -CAGGAGACTGAGCAGGGAGTGATGTCTTTCAAACCTACGTTTCAAGGATCCCTGGGTGGCGCAGCGGTTTGGCGCCTGCCTTTGGCCCAGGGCGCGATCC
d_CM016602.1:14442100 : -CAGGAGACTGAGCAGGGAGTGATGTCTTTCAAACCTACGTTTCAAGGATCCCTGGGTGGCGCAGCGGTTTGGCGCCTGCCTTTGGCCCAGGGCGCGATCC
b_CM000034.4:18577358 : -CAGGAGACTGAGCAGGGAGTGATGTCTTTCAAACCTACGTTTCAAGGATCCCTGGGTGGCGCAGCGGTTTGGCGCCTGCCTTTGGCCCAGGGCGCGATCC
s_CM021983.1:15827289 : ACCTACTCCCATATATCCTCAACTGATATTAGAAAGTAAAAAATAGGATCCCTGGGTGGCGCAGCGGTTTGGCGCCTGCCTTTGGCCCAGGGCGCGATCC
b_CM000022.4:15829122 : ACCTACTCCCATATATCCTCAACTGATATTAGAAAGTAAAAAATAGGATCCCTGGGTGGCGCAGCGGTTTGGCGCCTGCCTTTGGCCCAGGGCGCGATCC
s_CM021974.1:52019303 : ATGTTATCATTGGGGGTAAAAATTATCTATAGAAAGGGAGAAATTGGGATCCCTGGGTGGCGCAGCGGTTTGGCGCCTGCCTTTGGCCCAGGGCGCGATCC
b_CM000013.4:51160355 : ATGTTATCATTGGGGGTAAAAATTATCTATAGAAAGGGAGAAATTGGGATCCCTGGGTGGCGCAGCGGTTTGGCGCCTGCCTTTGGCCCAGGGCGCGATCC
s_MU018711.1:230916 : -CAGAAATATTGATTATCAATCAAGTCATCAAAAGTGAAGATGGGATCCCTGGGTGGCGCAGCGGTTTGGCGCCTGCCTTTGGCCCAGGGCGCGATCC
s_CM021981.1:2716075 : ATTTCTAGAGTTGCACATTCAGTTATTTAAATGTCAGTTTTTCAGGATCCCTGGGTGGCGCAGCGGTTTGGCGCCTGCCTTTGGCCCAGGGCGCGATCC
d_CM016588.1:2429172 : ATTTCTAGAGTTGCACATTCAGTTATTTAAATGTCAGTTTTTCAGGATCCCTGGGTGGCGCAGCGGTTTGGCGCCTGCCTTTGGCCCAGGGCGCGATCC
b_CM000020.4:2724602 : ATTTCTAGAGTTGCACATTCAGTTATTTAAATGTCAGTTTTTCAGGATCCCTGGGTGGCGCAGCGGTTTGGCGCCTGCCTTTGGCCCAGGGCGCGATCC
s_CM021980.1:49263820 : CTTTTTTTAAATTTCCATTTTAGTCCTATAAGGCAATGGTCCTGGGATCCCTGGGTGGCGCAGCGGTTTGGCGCCTGCCTTTGGCCCAGGGCGCGATCC
d_CM016587.1:47735003 : CTTTTTTTAAATTTCCATTTTAGTCCTATAAGGCAATGGTCCTGGGATCCCTGGGTGGCGCAGCGGTTTGGCGCCTGCCTTTGGCCCAGGGCGCGATCC
s_CM021967.1:7694852 : TAATGCCATTATCATGCCTAACAAAATTAATAATATTCCTTTAGGATCCCTGGGTGGCGCAGCGGTTTGGCGCCTGCCTTTGGCCCAGGGCGCGATCC
d_CM016574.1:7567605 : TAATGCCATTATCATGCCTAACAAAATTAATAATATTCCTTTAGGATCCCTGGGTGGCGCAGCGGTTTGGCGCCTGCCTTTGGCCCAGGGCGCGATCC
s_CM021962.1:106324370 : GTAGCTTAAAATTTACTAATGGCCACATTTAAAAAGTAGAAAGAGGATCCCTGGGTGGCGCAGCGGTTTGGCGCCTGCCTTTGGCCCAGGGCGCGATCC
d_CM016569.1:105888100 : GTAGCTTAAAATTTACTAATGGCCACATTTAAAAAGTAGAAAGAGGATCCCTGGGTGGCGCAGCGGTTTGGCGCCTGCCTTTGGCCCAGGGCGCGATCC
b_CM000001.4:105279680 : GTAGCTTAAAATTTACTAATGGCCACATTTAAAAAGTAGAAAGAGGATCCCTGGGTGGCGCAGCGGTTTGGCGCCTGCCTTTGGCCCAGGGCGCGATCC
s_CM021982.1:34324034 : ATACAATGAAAGGTCTGAGACTTTAAGAAAGAATTCAGGGCTCTGGGATCCCTGGGTGGCGCAGCGGTTTGGCGCCTGCCTTTGGCCCAGGGCGCGATCC
b_CM000021.4:33288465 : ATACAATGAAAGGTCTGAGACTTTAAGAAAGAATTCAGGGCTCTGGGATCCCTGGGTGGCGCAGCGGTTTGGCGCCTGCCTTTGGCCCAGGGCGCGATCC
s_CM021971.1:29008115 : TGGCATTCCCAAGTCTCTTACAGTGTCTTAAGAAGATCTCTCCAGGATCCCTGGGTGGCGCAGCGGTTTGGCGCCTGCCTTTGGCCCAGGGCGCGATCC
d_CM016578.1:28521418 : TGGCATTCCCAAGTCTCTTACAGTGTCTTAAGAAGATCTCTCCAGGATCCCTGGGTGGCGCAGCGGTTTGGCGCCTGCCTTTGGCCCAGGGCGCGATCC

```

b\_CM000010.4:27962182 : TGGCATTCCCAAGTCTCTTACAGTGTCTTAAGAAGATCTCTCCA  
d\_CM016581.1:36417555 : CCAGCGAAGGGACGCTCCCGGGTCTCTAGGAAAAGGCCAGCTCA  
b\_CM000014.4:26681805 : TTTATACGGGATATGGATGAACAGCCTAATAAATTTGGTACACTG  
s\_CM021983.1:49473247 : CCCAGGCACCCTGCTTTCTTTTGCTTTTTTAATTTTATTTTTTGG  
s\_CM021969.1:53495922 : GTATAGTTTCTTTGATGATTTTTTGTTTTTAAAGCTTCTGTCTT  
d\_CM016576.1:53100186 : GTATAGTTTCTTTGATGATTTTTTGTTTTTAAAGCTTCTGTCTT  
s\_CM022000.1:124513739 : AATTTTCATGTACTGGACAGACTAATTTCTAAAATTTCCCATTCAG  
d\_CM016607.1:122259922 : AATTTTCATGTACTGGACAGACTAATTTCTAAAATTTCCCATTCAG  
b\_CM000039.4:108377960 : AATTTTCATGTACTGGACAGACTAATTTCTAAAATTTCCCATTCAG  
d\_CM016583.1:30685492 : TCTTTTAGGTATGTTTGAATTTTCTTTTAAATAGAAAGCTTCTT  
b\_CM000015.4:31191229 : TCTTTTAGGTATGTTTGAATTTTCTTTTAAATAGAAAGCTTCTT  
s\_CM021983.1:27220998 : ATGACTGTATGGTTGTGAATTATATCTCATTAAAGCTAGTTTAA  
d\_CM016590.1:27110103 : ATGACTGTATGGTTGTGAATTATATCTCATTAAAGCTAGTTTAA  
b\_CM000022.4:26972534 : ATGACTGTATGGTTGTGAATTATATCTCATTAAAGCTAGTTTAA  
s\_CM021990.1:35056255 : TTTTCAGAAAGTAACATCTTGATTTTTGTTATTTAAAGGAAAAATA  
b\_CM000029.4:34574364 : TTTTCAGAAAGTAACATCTTGATTTTTGTTATTTAAAGGAAAAATA  
b\_CM000030.4:32702878 : TCTCTCATGAATAAATAAATAAATCTTTAAAGACAAATAAAG  
s\_CM021965.1:52147775 : AACTAATGTAATATTGTGCGTTACCTATAAAAAATTTTTTTTA  
d\_CM016572.1:51525463 : AACTAATGTAATATTGTGCGTTACCTATAAAAAATTTTTTTTA  
b\_CM000023.4:38752119 : GCATTTGCTTATTGGAGTATTTTTAGTAAAGAAATATATTTTCA  
s\_CM021995.1:32404702 : CTAATTTTCGATCATGTCACTTGACTCTTTAAACCCCTGCAATGG  
b\_CM000034.4:41229417 : CTAATTTTCGATCATGTCACTTGACTCTTTAAACCCCTGCAATGG  
d\_CM016602.1:32172425 : CTAATTTTCGATCATGTCACTTGACTCTTTAAACCCCTGCAATGG  
s\_CM021997.1:14667324 : CTTTTAAAAAGAATAGTTTCAGTGTTCTTTAAAAAGTTAAACCT  
d\_CM016604.1:14565027 : CTTTTAAAAAGAATAGTTTCAGTGTTCTTTAAAAAGTTAAACCT  
s\_CM021963.1:71894134 : GCCCTCCATTTTCTCCTGTGCTCCTTTTTTAAAAAATTAAATTA  
s\_CM021983.1:45943175 : TGTGAATTACGAAACTGTGTAGTACAATTTAGAAACGTAGCAGG  
s\_CM021963.1:18318682 : CTGGGCCTGCTTTCAAAGAGTTTGTTTTACAAAAGGACAAAATA  
b\_CM000002.4:16472404 : CTGGGCCTGCTTTCAAAGAGTTTGTTTTACAAAAGGACAAAATA  
s\_CM021981.1:32911909 : TAATGACAGGAATAGAAGAAAAGTGAAATTTAAAAATGTGCCATA  
d\_CM016588.1:32382961 : TAATGACAGGAATAGAAGAAAAGTGAAATTTAAAAATGTGCCATA  
b\_CM000020.4:32582772 : TAATGACAGGAATAGAAGAAAAGTGAAATTTAAAAATGTGCCATA  
s\_CM021991.1:17604839 : TTCTTCTGATTTGGAAGTGACCTTCTTTTAAAAATAGAAAGGT  
d\_CM016598.1:17380206 : TTCTTCTGATTTGGAAGTGACCTTCTTTTAAAAATAGAAAGGT  
s\_CM021972.1:23265552 : TCAGTGCTGCCTCCTGGCCCTGTACCTCTTTAGAACAAAATTGG  
d\_CM016579.1:22756425 : TCAGTGCTGCCTCCTGGCCCTGTACCTCTTTAGAACAAAATTGG  
b\_CM000011.4:22000418 : TCAGTGCTGCCTCCTGGCCCTGTACCTCTTTAGAACAAAATTGG  
s\_CM021988.1:9926312 : GAGTTTTTAAGTCATCTTTGTTTCAGCAATAAAAAATTTCCATTA  
b\_CM000027.5:10401007 : GAGTTTTTAAGTCATCTTTGTTTCAGCAATAAAAAATTTCCATTA  
s\_CM000008.4:72800272 : TTTAACACCAATGAAAAATAATTTATTATTTAAAAATAACATA  
b\_CM021970.1:18974382 : GCAAAACACAGTCTGGTTATCACGCTCAAGAAAATTCACATTTG  
s\_CM021998.1:30009360 : CAAACAAACACCATGAAACACAAGCTTAAAGATAGTAACTTCTA  
d\_CM016605.1:30057161 : CAAACAAACACCATGAAACACAAGCTTAAAGATAGTAACTTCTA  
b\_CM000037.4:30888146 : CAAACAAACACCATGAAACACAAGCTTAAAGATAGTAACTTCTA  
b\_CM000032.5:23742260 : CCAAGAATTAGAGTAACAGCCAACCTAGCAAAAACTGATCTAC

chr29 Can : TGGAGACCCGGGATCGAATCCACGTCGGGCTTT--CCGGTGCATGGAGCCTGCTTCTCCCTCTGCCTATGTCTCTGC---CTCTCTCTCTCTCTCACTG

s\_CM021973.1:11564704 : TGGAGACCCGGGATCGAATCCACGTCGGGCTTT--CCGGTGCATGGAGCCTGCTTCTCCCTCTGCCTATGTCTCTGC---CTCTCTCTCTCTCTCACTG

d\_CM016580.1:11386360 : TGGAGACCCGGGATCGAATCCACGTCGGGCTTT--CCGGTGCATGGAGCCTGCTTCTCCCTCTGCCTATGTCTCTGC---CTCTCTCTCTCTCTCACTG

b\_CM000012.4:11404058 : TGGAGACCCGGGATCGAATCCACGTCGGGCTTT--CCGGTGCATGGAGCCTGCTTCTCCCTCTGCCTATGTCTCTGC---CTCTCTCTCTCTCTCACTG

b\_CM000029.4:16380901 : TGGAGACCCGGGATCGAATCCACGTCGGGCTTT--CCGGTGCATGGAGCCTGCTTCTCCCTCTGCCTATGTCTCTGC---CTCTCTCTCTCTCTCACTG

s\_CM021990.1:16532681 : TGGAGACCCGGGATCGAATCCACGTCGGGCTTT--CCGGTGCATGGAGCCTGCTTCTCCCTCTGCCTATGTCTCTGC---CTCTCTCTCTCTCTCACTG

d\_CM016577.1:13904421 : TGGAGACCCGGGATCGAATCCACGTCGGGCTTT--CCGGTGCATGGAGCCTGCTTCTCCCTCTGCCTATGTCTCTGC---CTCTCTCTCTCTCTCACTG

s\_CM021965.1:28875877 : TGGAGACCCGGGATCGAATCCACGTCGGGCTTT--CCGGTGCATGGAGCCTGCTTCTCCCTCTGCCTGTGTCTCTGC---CTCTCTCTCTCTCTCACTG

d\_CM016572.1:28320367 : TGGAGACCCGGGATCGAATCCACGTCGGGCTTT--CCGGTGCATGGAGCCTGCTTCTCCCTCTGCCTGTGTCTCTGC---CTCTCTCTCTCTCTCACTG

b\_CM000004.4:28272540 : TGGAGACCCGGGATCGAATCCACGTCGGGCTTT--CCGGTGCATGGAGCCTGCTTCTCCCTCTGCCTGTGTCTCTGC---CTCTCTCTCTCTCTCACTG

s\_CM021995.1:29864792 : TGGAGACCCGGGATCGAATCCACGTCGGGCTTT--CCGGTGCATGGAGCCTGCTTCTCCCTCTGCCTGTGTCTCTGC---CTCTCTCTCTCTCTCACTG

b\_CM000034.4:38698570 : TGGAGACCCGGGATCGAATCCACGTCGGGCTTT--CCGGTGCATGGAGCCTGCTTCTCCCTCTGCCTGTGTCTCTGC---CTCTCTCTCTCTCTCACTG

d\_CM016602.1:29638837 : TGGAGACCCGGGATCGAATCCACGTCGGGCTTT--CCGGTGCATGGAGCCTGCTTCTCCCTCTGCCTGTGTCTCTGC---CTCTCTCTCTCTCTCACTG

s\_CM021979.1:45176522 : TGGAGACCCGGGATCGAATCCACGTCGGGCTTT--CCGGTGCATGGAGCCTGCTTCTCCCTCTGCCTGTGTCTCTGC---CTCTCTCTCTCTCTCACTG

s\_CM021973.1:55357485 : TGGAGACCCGGGATCGAATCCACGTCGGGCTTT--CCGGTGCATGGAGCCTGCTTCTCCCTCTGCCTGTGTCTCTGC---CTCTCTCTCTCTCTCACTG

d\_CM016580.1:55248210 : TGGAGACCCGGGATCGAATCCACGTCGGGCTTT--CCGGTGCATGGAGCCTGCTTCTCCCTCTGCCTGTGTCTCTGC---CTCTCTCTCTCTCTCACTG

b\_CM000012.4:54909836 : TGGAGACCCGGGATCGAATCCACGTCGGGCTTT--CCGGTGCATGGAGCCTGCTTCTCCCTCTGCCTGTGTCTCTGC---CTCTCTCTCTCTCTCACTG

s\_CM021976.1:36514210 : TGGAGACCCGGGATCGAATCCACGTCGGGCTTT--CCGGTGCATGGAGCCTGCTTCTCCCTCTGCCTATGTCTCTGC---CTCTCTCTCTCTCTCACTG

b\_CM000015.4:36603774 : TGGAGACCCGGGATCGAATCCACGTCGGGCTTT--CCGGTGCATGGAGCCTGCTTCTCCCTCTGCCTATGTCTCTGC---CTCTCTCTCTCTCTCACTG

s\_CM021987.1:29177051 : TGGAGACCCGGGATCGAATCCACGTCGGGCTTT--CCGGTGCATGGAGCCTGCTTCTCCCTCTGCCTATGTCTCTGC---CTCTCTCTCTCTCTCACTG

b\_CM000026.4:28974192 : TGGAGACCCGGGATCGAATCCACGTCGGGCTTT--CCGGTGCATGGAGCCTGCTTCTCCCTCTGCCTATGTCTCTGC---CTCTCTCTCTCTCTCACTG

s\_CM021992.1:39506440 : TGGAGACCCGGGATCGAATCCACGTCGGGCTTT--CCGGTGCATGGAGCCTGCTTCTCCCTCTGCCTATGTCTCTGC---CTCTCTCTCTCTCTCACTG

d\_CM016599.1:39027764 : TGGAGACCTCGGGATCGAATCCACGTCGGGCTTT--CCGGTGCATGGAGCCTGCTTCTCCCTCTGCCTATGTCTCTGC---CTCTCTCTCTCTCTCACTG

b\_CM000031.4:38752766 : TGGAGACCCGGGATCGAATCCACGTCGGGCTTT--CCGGTGCATGGAGCCTGCTTCTCCCTCTGCCTATGTCTCTGC---CTCTCTCTCTCTCTCACTG

d\_CM016588.1:3987471 : TGGAGACCCGGGATCGAATCCACGTCGGGCTTT--CCGGTGCATGGAGCCTGCTTCTCCCTCTGCCTATGTCTCTGC---CTCTCTCTCTCTCTCACTG

s\_CM021995.1:14669264 : TGGAGACCCGGGATCGAATCCACGTCGGGCTTT--CCGGTGCATGGAGCCTGCTTCTCCCTCTGCCTGTGTCTCTGC---CTCTCTCTCTCTCTCACTG

d\_CM016602.1:14442100 : TGGAGACCCGGGATCGAATCCACGTCGGGCTTT--CCGGTGCATGGAGCCTGCTTCTCCCTCTGCCTGTGTCTCTGC---CTCTCTCTCTCTCTCACTG

b\_CM000034.4:18577358 : TGGAGACCCGGGATCGAATCCACGTCGGGCTTT--CCGGTGCATGGAGCCTGCTTCTCCCTCTGCCTGTGTCTCTGC---CTCTCTCTCTCTCTCACTG

s\_CM021983.1:15827289 : TGGAGACCCGGGATCGAATCCACGTCGGGCTTT--CCGGTGCATGGAGCCTGCTTCTCCCTCTGCCTATGTCTCTGC---CTCTCTCTCTCTCTCACTG

b\_CM000022.4:15829122 : TGGAGACCCGGGATCGAATCCACGTCGGGCTTT--CCGGTGCATGGAGCCTGCTTCTCCCTCTGCCTATGTCTCTGC---CTCTCTCTCTCTCTCACTG

s\_CM021974.1:52019303 : TGGAGACCCGGGATCGAATCCACGTCGGGCTTT--CCGGTGCATGGAGCCTGCTTCTCCCTCTGCCTGTGTCTCTGC---CTCTCTCTCTCTCTCACTG

b\_CM000013.4:51160355 : TGGAGACCCGGGATCGAATCCACGTCGGGCTTT--CCGGTGCATGGAGCCTGCTTCTCCCTCTGCCTGTGTCTCTGC---CTCTCTCTCTCTCTCACTG

s\_MU018711.1:230916 : TGGAGACCCGGGATCGAATCCACGTCGGGCTTT--CCGGTGCATGGAGCCTGCTTCTCCCTCTGCCTATGTCTCTGC---CTCTCTCTCTCTCTCACTG

s\_CM021981.1:2716075 : TGGAGACCCGGGATCGAATCCACGTCGGGCTTT--CCGGTGCATGGAGCCTGCTTCTCCCTCTGCCTGTGTCTCTGC---CTCTCTCTCTCTCTCACTG

d\_CM016588.1:2429172 : TGGAGACCCGGGATCGAATCCACGTCGGGCTTT--CCGGTGCATGGAGCCTGCTTCTCCCTCTGCCTGTGTCTCTGC---CTCTCTCTCTCTCTCACTG

b\_CM000020.4:2724602 : TGGAGACCCGGGATCGAATCCACGTCGGGCTTT--CCGGTGCATGGAGCCTGCTTCTCCCTCTGCCTGTGTCTCTGC---CTCTCTCTCTCTCTCACTG

s\_CM021980.1:49263820 : TGGAGACCCGGGATCGAATCCACGTCGGGCTTT--CCGGTGCATGGAGCCTGCTTCTCCCTCTGCCTGTGTCTCTGC---CTCTCTCTCTCTCTCACTG

d\_CM016587.1:47735003 : TGGAGACCCGGGATCGAATCCACGTCGGGCTTT--CCGGTGCATGGAGCCTGCTTCTCCCTCTGCCTGTGTCTCTGC---CTCTCTCTCTCTCTCACTG

s\_CM021967.1:7694852 : TGGAGACCCGGGATCGAATCCACGTCGGGCTTT--CCGGTGCATGGAGCCTGCTTCTCCCTCTGCCTGTGTCTCTGC---CTCTCTCTCTCTCTCACTG

d\_CM016574.1:7567605 : TGGAGACCCGGGATCGAATCCACGTCGGGCTTT--CCGGTGCATGGAGCCTGCTTCTCCCTCTGCCTGTGTCTCTGC---CTCTCTCTCTCTCTCACTG

s\_CM021962.1:106324370 : TGGAGACCCGGGATCGAATCCACGTCGGGCTTT--CCGGTGCATGGAGCCTGCTTCTCCCTCTGCCTGTGTCTCTGC---CTCTCTCTCTCTCTCACTG

d\_CM016569.1:105888100 : TGGAGACCCGGGATCGAATCCACGTCGGGCTTT--CCGGTGCATGGAGCCTGCTTCTCCCTCTGCCTGTGTCTCTGC---CTCTCTCTCTCTCTCACTG

b\_CM000001.4:105279680 : TGGAGACCCGGGATCGAATCCACGTCGGGCTTT--CCGGTGCATGGAGCCTGCTTCTCCCTCTGCCTGTGTCTCTGC---CTCTCTCTCTCTCTCACTG

s\_CM021982.1:34324034 : TGGAGACCCGGGATCGAATCCACGTCGGGCTTT--CCGGTGCATGGAGCCTGCTTCTCCCTCTGCCTGTGTCTCTGC---CTCTCTCTCTCTCTCACTG

b\_CM000021.4:33288465 : TGGAGACCCGGGATCGAATCCACGTCGGGCTTT--CCGGTGCATGGAGCCTGCTTCTCCCTCTGCCTGTGTCTCTGC---CTCTCTCTCTCTCTCACTG

s\_CM021971.1:29008115 : TGGAGACCCGGGATCGAATCCACGTCGGGCTTT--CCGGTGCATGGAGCCTGCTTCTCCCTCTGCCTGTGTCTCTGC---CTCTCTCTCTCTCTCACTG

d\_CM016578.1:28521418 : TGGAGACCCGGGATCGAATCCACGTCGGGCTTT--CCGGTGCATGGAGCCTGCTTCTCCCTCTGCCTGTGTCTCTGC---CTCTCTCTCTCTCTCACTG

b\_CM000010.4:27962182 : TGGAGACCCGGGATCGAATCCACGTCGGGCTTT--CCGGTGCATGGAGCCTGCTTCTCCCTCTGCCTGTGTCTCTGC---CTCTCTCTCTCTCTCACTG

|                        |   |                                   |    |                                            |      |                       |
|------------------------|---|-----------------------------------|----|--------------------------------------------|------|-----------------------|
| d_CM016581.1:36417555  | : | TGGAGACCCGGGATCGAATCCACGTCGGGCTTT | -- | CCGGTGCATGGAGCCTGCTTCTCCCTCTGCCTGTGTCTCTGC | ---- | CTCTCTCTCTCTCTCACTG   |
| b_CM000014.4:26681805  | : | TGGAGACCCGGGATCGAATCCACGTCGGGCTTT | -- | CCGGTGCATGGAGCCTGCTTCTCCCTCTGCCTGTGTCTCTGC | ---- | CTCTCTCTCTCTCTCACTG   |
| s_CM021983.1:49473247  | : | TGGAGACCCGGGATCGAATCCACGTCGGGCTTT | -- | CCGGTGCATGGAGCCTGCTTCTCCCTCTGCCTGTGTCTCTGC | ---- | CTCTCTCTCTCTCTCACTG   |
| s_CM021969.1:53495922  | : | TGGAGACCCGGGATCGAATCCACGTCGGGCTTT | -- | CCGGTGCATGGAGCCTGCTTCTCCCTCTGCCTGTGTCTCTGC | ---- | CTCTCTCTCTCTCTCACTG   |
| d_CM016576.1:53100186  | : | TGGAGACCCGGGATCGAATCCACGTCGGGCTTT | -- | CCGGTGCATGGAGCCTGCTTCTCCCTCTGCCTGTGTCTCTGC | ---- | CTCTCTCTCTCTCTCACTG   |
| s_CM022000.1:124513739 | : | TGGAGACCCGGGATCGAATCCACGTCGGGCTTT | -- | CCGGTGCATGGAGCCTGCTTCTCCCTCTGCCTGTGTCTCTGC | ---- | CTCTCTCTCTCTCTCTCACTG |
| d_CM016607.1:122259922 | : | TGGAGACCCGGGATCGAATCCACGTCGGGCTTT | -- | CCGGTGCATGGAGCCTGCTTCTCCCTCTGCCTGTGTCTCTGC | ---- | CTCTCTCTCTCTCTCTCACTG |
| b_CM000039.4:108377960 | : | TGGAGACCCGGGATCGAATCCACGTCGGGCTTT | -- | CCGGTGCATGGAGCCTGCTTCTCCCTCTGCCTGTGTCTCTGC | ---- | CTCTCTCTCTCTCTCTCACTG |
| d_CM016583.1:30685492  | : | TGGAGACCCGGGATCGAATCCACGTCGGGCTTT | -- | CCGGTGCATGGAGCCTGCTTCTCCCTCTGCCTGTGTCTCTGC | ---- | CTCTCTCTCTCTCTCACTG   |
| b_CM000015.4:31191229  | : | TGGAGACCCGGGATCGAATCCACGTCGGGCTTT | -- | CCGGTGCATGGAGCCTGCTTCTCCCTCTGCCTGTGTCTCTGC | ---- | CTCTCTCTCTCTCTCACTG   |
| s_CM021983.1:27220998  | : | TGGAGACCCGGGATCGAATCCACGTCGGGCTTT | -- | CCGGTGCATGGAGCCTGCTTCTCCCTCTGCCTGTGTCTCTGC | CTCT | CTCTCTCTCTCTCTCTCACTG |
| d_CM016590.1:27110103  | : | TGGAGACCCGGGATCGAATCCACGTCGGGCTTT | -- | CCGGTGCATGGAGCCTGCTTCTCCCTCTGCCTGTGTCTCTGC | CTCT | CTCTCTCTCTCTCTCTCACTG |
| b_CM000022.4:26972534  | : | TGGAGACCCGGGATCGAATCCACGTCGGGCTTT | -- | CCGGTGCATGGAGCCTGCTTCTCCCTCTGCCTGTGTCTCTGC | CTCT | CTCTCTCTCTCTCTCTCACTG |
| s_CM021990.1:35056255  | : | TGGAGACCCGGGATCGAATCCACGTCGGGCTTT | -- | CCGGTGCATGGAGCCTGCTTCTCCCTCTGCCTGTGTCTCTGC | CTCT | CTCTCTCTCTCTCTCTCACTG |
| b_CM000029.4:34574364  | : | TGGAGACCCGGGATCGAATCCACGTCGGGCTTT | -- | CCGGTGCATGGAGCCTGCTTCTCCCTCTGCCTGTGTCTCTGC | CTCT | CTCTCTCTCTCTCTCTCACTG |
| b_CM000030.4:32702878  | : | TGGAGACCCGGGATCGAATCCACGTCGGGCTTT | -- | CCGGTGCATGGAGCCTGCTTCTCCCTCTGCCTGTGTCTCTGC | CTCT | CTCTCTCTCTCTCTCTCACTG |
| s_CM021965.1:52147775  | : | TGGAGACCCGGGATCGAATCCACGTCGGGCTTT | -- | CCGGTGCATGGAGCCTGCTTCTCCCTCTGCCTGTGTCTCTGC | CTCT | CTCTCTCTCTCTCTCTCACTG |
| d_CM016572.1:51525463  | : | TGGAGACCCGGGATCGAATCCACGTCGGGCTTT | -- | CCGGTGCATGGAGCCTGCTTCTCCCTCTGCCTGTGTCTCTGC | CTCT | CTCTCTCTCTCTCTCTCACTG |
| b_CM000023.4:38752119  | : | TGGAGACCCGGGATCGAATCCACGTCGGGCTTT | -- | CCGGTGCATGGAGCCTGCTTCTCCCTCTGCCTGTGTCTCTGC | CTCT | CTCTCTCTCTCTCTCTCACTG |
| s_CM021995.1:32404702  | : | TGGAGACCCGGGATCGAATCCACGTCGGGCTTT | -- | CCGGTGCATGGAGCCTGCTTCTCCCTCTGCCTGTGTCTCTGC | CTCT | CTCTCTCTCTCTCTCTCACTG |
| b_CM000034.4:41229417  | : | TGGAGACCCGGGATCGAATCCACGTCGGGCTTT | -- | CCGGTGCATGGAGCCTGCTTCTCCCTCTGCCTGTGTCTCTGC | CTCT | CTCTCTCTCTCTCTCTCACTG |
| d_CM016602.1:32172425  | : | TGGAGACCCGGGATCGAATCCACGTCGGGCTTT | -- | CCGGTGCATGGAGCCTGCTTCTCCCTCTGCCTGTGTCTCTGC | CTCT | CTCTCTCTCTCTCTCTCACTG |
| s_CM021997.1:14667324  | : | TGGAGACCCGGGATCGAATCCACGTCGGGCTTT | -- | CCGGTGCATGGAGCCTGCTTCTCCCTCTGCCTGTGTCTCTGC | CTCT | CTCTCTCTCTCTCTCTCACTG |
| d_CM016604.1:14565027  | : | TGGAGACCCGGGATCGAATCCACGTCGGGCTTT | -- | CCGGTGCATGGAGCCTGCTTCTCCCTCTGCCTGTGTCTCTGC | CTCT | CTCTCTCTCTCTCTCTCACTG |
| s_CM021963.1:71894134  | : | TGGAGACCCGGGATCGAATCCACGTCGGGCTTT | -- | CCGGTGCATGGAGCCTGCTTCTCCCTCTGCCTGTGTCTCTGC | CTCT | CTCTCTCTCTCTCTCTCACTG |
| s_CM021983.1:45943175  | : | TGGAGACCCGGGATCGAATCCACGTCGGGCTTT | -- | CCGGTGCATGGAGCCTGCTTCTCCCTCTGCCTGTGTCTCTGC | CTCT | CTCTCTCTCTCTCTCTCACTG |
| s_CM021963.1:18318682  | : | TGGAGACCCGGGATCGAATCCACGTCGGGCTTT | -- | CCGGTGCATGGAGCCTGCTTCTCCCTCTGCCTATGTCTCTGC | ---- | CTCTCTCTCTCTCTCTCACTG |
| b_CM000002.4:16472404  | : | TGGAGACCCGGGATCGAATCCACGTCGGGCTTT | -- | CCGGTGCATGGAGCCTGCTTCTCCCTCTGCCTATGTCTCTGC | ---- | CTCTCTCTCTCTCTCTCACTG |
| s_CM021981.1:32911909  | : | TGGAGACCCGGGATCGAATCCACGTCGGGCTTT | -- | CCGGTGCATGGAGCCTGCTTCTCCCTCTGCCTGTGTCTCTGC | CTCT | CTCTCTCTCTCTCTCTCACTG |
| d_CM016588.1:32382961  | : | TGGAGACCCGGGATCGAATCCACGTCGGGCTTT | -- | CCGGTGCATGGAGCCTGCTTCTCCCTCTGCCTGTGTCTCTGC | CTCT | CTCTCTCTCTCTCTCTCACTG |
| b_CM000020.4:32582772  | : | TGGAGACCCGGGATCGAATCCACGTCGGGCTTT | -- | CCGGTGCATGGAGCCTGCTTCTCCCTCTGCCTGTGTCTCTGC | CTCT | CTCTCTCTCTCTCTCTCACTG |
| s_CM021991.1:17604839  | : | TGGAGACCCGGGATCGAATCCACGTCGGGCTTT | -- | CCGGTGCATGGAGCCTGCTTCTCCCTCTGCCTGTGTCTCTGC | CTCT | CTCTCTCTCTCTCTCTCACTG |
| d_CM016598.1:17380206  | : | TGGAGACCCGGGATCGAATCCACGTCGGGCTTT | -- | CCGGTGCATGGAGCCTGCTTCTCCCTCTGCCTGTGTCTCTGC | CTCT | CTCTCTCTCTCTCTCTCACTG |
| s_CM021972.1:23265552  | : | TGGAGACCCGGGATCGAATCCACATCGGGCTTT | -- | CCGGTGCATGGAGCCTGCTTCTCCCTCTGCCTATGTCTCTGC | ---- | CTCTCTCTCTCTCTCTCACTG |
| d_CM016579.1:22756425  | : | TGGAGACCCGGGATCGAATCCACGTCGGGCTTT | -- | CCGGTGCATGGAGCCTGCTTCTCCCTCTGCCTATGTCTCTGC | ---- | CTCTCTCTCTCTCTCTCACTG |
| b_CM000011.4:22000418  | : | TGGAGACCCGGGATCGAATCCACGTCGGGCTTT | -- | CCGGTGCATGGAGCCTGCTTCTCCCTCTGCCTATGTCTCTGC | ---- | CTCTCTCTCTCTCTCTCACTG |
| s_CM021988.1:9926312   | : | TGGAGACCCGGGATCGAATCCACGTCGGGCTTT | -- | CCGGTGCATGGAGCCTGCTTCTCCCTCTGCCTATGTCTCTGC | ---- | CTCTCTCTCTCTCTCACTG   |
| b_CM000027.5:10401007  | : | TGGAGACCCGGGATCGAATCCACGTCGGGCTTT | -- | CCGGTGCATGGAGCCTGCTTCTCCCTCTGCCTATGTCTCTGC | ---- | CTCTCTCTCTCTCTCACTG   |
| b_CM000008.4:72800272  | : | TGGAGACCCGGGATCGAATCCACGTCGGGCTTT | CC | CCGGTGCATGGAGCCTGCTTCTCCCTCTGCCTGTGTCTCTGC | ---- | CTCTCTCTCTCTCTCACTG   |
| s_CM021970.1:18974382  | : | TGGAGACCCGGGATCGAATCCACGTCGGGCTTT | CC | CCGGTGCATGGAGCCTGCTTCTCCCTCTGCCTGTGTCTCTGC | ---- | CTCTCTCTCTCTCTCACTG   |
| s_CM021998.1:30009360  | : | TGGAGACCCGGGATCGAATCCACGTCGGGCTC  | -- | CCGGTGCATGGAGCCTGCTTCTCCCTCTGCCTGTCTCT     | ---- | GCCTCTCTCTCTCTCTCACTG |
| d_CM016605.1:30057161  | : | TGGAGACCCGGGATCGAATCCACGTCGGGCTC  | -- | CCGGTGCATGGAGCCTGCTTCTCCCTCTGCCTGTCTCT     | ---- | GCCTCTCTCTCTCTCTCACTG |
| b_CM000037.4:30888146  | : | TGGAGACCCGGGATCGAATCCACGTCGGGCTC  | -- | CCGGTGCATGGAGCCTGCTTCTCCCTCTGCCTGTCTCT     | ---- | GCCTCTCTCTCTCTCTCACTG |
| b_CM000032.5:23742260  | : | TGGAGACCCGGGATCGAATCCACGTCGGGCTTT | -- | CCGGTGCATGAGCCTGCTTCTCCCTCTGCCTGTGTCTCTGC  | CTCT | CTCTCTCTCTCTCTCTCACTG |

chr29 Can : TGTGCCTATCATAAATAAAAT-----AAAAAAATT-----AAAAAAGGATATAATGGGCAAGAGATG-----  
s\_CM021973.1:11564704 : TGTGCCTATCATAAATAAAAT-----AAAAAAATT-----AAAAAAGGATATAATGGGCAAGAGATG-----  
d\_CM016580.1:11386360 : TGTGCCTATCATAAATAAAAT-----AAAAAAATT-----AAAAAAGGATATAATGGGCAAGAGATG-----  
b\_CM000012.4:11404058 : TGTGCCTATCATAAATAAAAT-----AAAAAAATT-----AAAAAAGGATATAATGGGCAAGAGATG-----  
b\_CM000029.4:16380901 : TGTGCCTATCATAAATAAAAT-----AAAAAAATT-----AAAAAAGGATATAATGGGCAAGAGATG-----  
s\_CM021990.1:16532681 : TGTGCCTATCATAAATAAAAT-----AAAAAAATT-----AAAAAAGGATATAATGGGCAAGAGATG-----  
d\_CM016577.1:13904421 : TGTGCCTATCATAAATAAAAT-----AAAAAAATT-----AAAAAAGGATATAATGGGCAAGAGATG-----  
s\_CM021965.1:28875877 : TGTGCCTATCATAAATAAAAT-----AAAAAAATT-----AAAAAAGGATATAATGGGCAAGAGATG-----  
d\_CM016572.1:28320367 : TGTGCCTATCATAAATAAAAT-----AAAAAAATT-----AAAAAAGGATATAATGGGCAAGAGATG-----  
b\_CM000004.4:28272540 : TGTGCCTATCATAAATAAAAT-----AAAAAAATT-----AAAAAAGGATATAATGGGCAAGAGATG-----  
s\_CM021995.1:29864792 : TGTGCCTATCATAAATAAAAT-----AAAAAAATT-----AAAAAAGGATATAATGGGCAAGAGATG-----  
b\_CM000034.4:38698570 : TGTGCCTATCATAAATAAAAT-----AAAAAAATT-----AAAAAAGGATATAATGGGCAAGAGATG-----  
d\_CM016602.1:29638837 : TGTGCCTATCATAAATAAAAT-----AAAAAAATT-----AAAAAAGGATATAATGGGCAAGAGATG-----  
s\_CM021979.1:45176522 : TGTGCCTATCATAAATAAAAT-----AAAAAAATT-----AAAAAAGGATATAATGGGCAAGAGATG-----  
s\_CM021973.1:55357485 : TGTGCCTATCATAAATAAAAT-----AAAAAAATT-----AAAAAAGGATATAATGGGCAAGAGATG-----  
d\_CM016580.1:55248210 : TGTGCCTATCATAAATAAAAT-----AAAAAAATT-----AAAAAAGGATATAATGGGCAAGAGATG-----  
b\_CM000012.4:54909836 : TGTGCCTATCATAAATAAAAT-----AAAAAAATT-----AAAAAAGGATATAATGGGCAAGAGATG-----  
s\_CM021976.1:36514210 : TGTGCCTATCATAAATAAAAT-----AAAAAAATT-----AAAAAAGGATATAATGGGCAAGAGATG-----  
b\_CM000015.4:36603774 : TGTGCCTATCATAAATAAAAT-----AAAAAAATT-----AAAAAAGGATATAATGGGCAAGAGATG-----  
s\_CM021987.1:29177051 : TGTGCCTATCATAAATAAAAT-----AAAAAAATT-----AAAAAAGGATATAATGGGCAAGAGATG-----  
b\_CM000026.4:28974192 : TGTGCCTATCATAAATAAAAT-----AAAAAAATT-----AAAAAAGGATATAATGGGCAAGAGATG-----  
s\_CM021992.1:39506440 : TGTGCCTATCATAAATAAAAT-----AAAAAAATT-----AAAAAAGGATATAATGGGCAAGAGATG-----  
d\_CM016599.1:39027764 : TGTGCCTATCATAAATAAAAT-----AAAAAAATT-----AAAAAAGGATATAATGGGCAAGAGATG-----  
b\_CM000031.4:38752766 : TGTGCCTATCATAAATAAAAT-----AAAAAAATT-----AAAAAAGGATATAATGGGCAAGAGATG-----  
d\_CM016588.1:3987471 : TGTGCCTATCATAAATAAAAT-----AAAAAAATT-----AAAAAAGGATATAATGGGCAAGAGATG-----  
s\_CM021995.1:14669264 : TGTGCCTATCATAAATAAAAT-----AAAAAAATT-----AAAAAAGGATATAATGGGCAAGAGATG-----  
d\_CM016602.1:14442100 : TGTGCCTATCATAAATAAAAT-----AAAAAAATT-----AAAAAAGGATATAATGGGCAAGAGATG-----  
b\_CM000034.4:18577358 : TGTGCCTATCATAAATAAAAT-----AAAAAAATT-----AAAAAAGGATATAATGGGCAAGAGATG-----  
s\_CM021983.1:15827289 : TGTGCCTATCATAAATAAAAT-----AAAAAAATT-----AAAAAAGGATATAATGGGCAAGAGATG-----  
b\_CM000022.4:15829122 : TGTGCCTATCATAAATAAAAT-----AAAAAAATT-----AAAAAAGGATATAATGGGCAAGAGATG-----  
s\_CM021974.1:52019303 : TGTGCCTATCATAAATAAAAT-----AAAAAAATT-----AAAAAAGGATATAATGGGCAAGAGATG-----  
b\_CM000013.4:51160355 : TGTGCCTATCATAAATAAAAT-----AAAAAAATT-----AAAAAAGGATATAATGGGCAAGAGATG-----  
s\_MU018711.1:230916 : TGTGCCTATCATAAATAAAAT-----AAAAAAATT-----AAAAAAGGATATAATGGGCAAGAGATG-----  
s\_CM021981.1:2716075 : TGTGCCTATCATAAATAAAAT-----AAAAAAATT-----AAAAAAGGATATAATGGGCAAGAGATG-----  
d\_CM016588.1:2429172 : TGTGCCTATCATAAATAAAAT-----AAAAAAATT-----AAAAAAGGATATAATGGGCAAGAGATG-----  
b\_CM000020.4:2724602 : TGTGCCTATCATAAATAAAAT-----AAAAAAATT-----AAAAAAGGATATAATGGGCAAGAGATG-----  
s\_CM021980.1:49263820 : TGTGCCTATCATAAATAAAAT-----AAAAAAATT-----AAAAAAGGATATAATGGGCAAGAGATG-----  
d\_CM016587.1:47735003 : TGTGCCTATCATAAATAAAAT-----AAAAAAATT-----AAAAAAGGATATAATGGGCAAGAGATG-----  
s\_CM021967.1:7694852 : TGTGCCTATCATAAATAAAAT-----AAAAAAATT-----AAAAAAGGATATAATGGGCAAGAGATG-----  
d\_CM016574.1:7567605 : TGTGCCTATCATAAATAAAAT-----AAAAAAATT-----AAAAAAGGATATAATGGGCAAGAGATG-----  
s\_CM021962.1:106324370 : TGTGCCTATCATAAATAAAAT-----AAAAAAATT-----AAAAAAGGATATAATGGGCAAGAGATG-----  
d\_CM016569.1:105888100 : TGTGCCTATCATAAATAAAAT-----AAAAAAATT-----AAAAAAGGATATAATGGGCAAGAGATG-----  
b\_CM000001.4:105279680 : TGTGCCTATCATAAATAAAAT-----AAAAAAATT-----AAAAAAGGATATAATGGGCAAGAGATG-----  
s\_CM021982.1:34324034 : TGTGCCTATCATAAATAAAAT-----AAAAAAATT-----AAAAAAGGATATAATGGGCAAGAGATG-----  
b\_CM000021.4:33288465 : TGTGCCTATCATAAATAAAAT-----AAAAAAATT-----AAAAAAGGATATAATGGGCAAGAGATG-----  
s\_CM021971.1:29008115 : TGTGCCTATCATAAATAAAAT-----AAAAAAATT-----AAAAAAGGATATAATGGGCAAGAGATG-----  
d\_CM016578.1:28521418 : TGTGCCTATCATAAATAAAAT-----AAAAAAATT-----AAAAAAGGATATAATGGGCAAGAGATG-----  
b\_CM000010.4:27962182 : TGTGCCTATCATAAATAAAAT-----AAAAAAATT-----AAAAAAGGATATAATGGGCAAGAGATG-----

d\_CM016581.1:36417555 : TGTGCCTATCATAAATAAAT-----AAAAAATT-AAAAAAAAAATTAAAAAAAAAAAAAAAAAAAAAGGAAAGGCCAGCTCGAGAGCCCTGGCCCGCAT  
 b\_CM000014.4:26681805 : TGTGCCTATCATAAATAAAT-----AAAAAATT-AAAAAAAAAATGTAAATTGGTACTACTGGGTGAGGTACAGAAGGTCTCAATACAGGTGCTTCTGTG  
 s\_CM021983.1:49473247 : TGTGCCTATCATAAATAAAT-----AAAAAATT-AAAAAAAAAATTTTATTTTTTTGAAATTATGGTAAAAAAAAAATCCACATAATATAAATTTATCTAG  
 s\_CM021969.1:53495922 : TGTGCCTATCATAAATAAAT-----AAAAAATAAAAAAAAAAAAAA-TTAAAGCTTCTGTCCATTTTAGGTTACTTAACCTAACCTAAGCTCTGGAAAGAG  
 d\_CM016576.1:53100186 : TGTGCCTATCATAAATAAAT-----AAAAAATAAAAAAAAAAAAAATTAAAGCTTCTGTCCATTTTAGGTTACTTAACCTAACCTAAGCTCTGGAAAGAG  
 s\_CM022000.1:124513739 : TGTGCCTATCATAAATAAAT-----AAAAAATT-AAAAAAAAATAAAATAAAATAAAATTTCCCATTCAGAATTAATAAACTTATAATTTTGAAGAAAAAT  
 d\_CM016607.1:122259922 : TGTGCCTATCATAAATAAAT-----AAAAAATT-AAAAAAAAATAAAATAAAATAAAATTTCCCATTCAGAATTAATAAACTTATAATTTTGAAGAAAAAT  
 b\_CM000039.4:108377960 : TGTGCCTATCATAAATAAAT-----AAAAAATT-AAAAAAAAATAAAATAAAATAAAATTTCCCATTCAGAATTAATAAACTTATAATTTTGAAGAAAAAT  
 d\_CM016583.1:30685492 : TGTGCCTATCATAAATAAAT-----AAAAAATT-AAAAAAAAAAAAAAAAAATTAAAAAAAAAAAAAAAAAAAAATAGAAAGCTTCTTGATGCACATTTATCA  
 b\_CM000015.4:31191229 : TGTGCCTATCATAAATAAAT-----AAAAAATT-AAAAAAAAAAAAAAAAAATTAAAAAAAAAAAAAAAAAAAAA-ATAGAAAGCTTCTTGATGCACATTTATCA  
 s\_CM021983.1:27220998 : TGTGCCTATCATAAATAAAT-----AAAAAATT-AAAAAAAAAAAAAAAAAAAAAGCTAGTTTAAAAACAATATTGGCAAAATGTTTGTCAATTGTTACAA  
 d\_CM016590.1:27110103 : TGTGCCTATCATAAATAAAT-----AAAAAATT-AAAAAAAAAAAAAAAAAAAA-AAAAGCTAGTTTAAAAACAATATTGGCAAAATGTTTGTCAATTGTTACAA  
 b\_CM000022.4:26972534 : TGTGCCTATCATAAATAAAT-----AAAAAATT-AAAAAAAAAAAAA-----AAAAGCTAGTTTAAAAACAATATTGGCAAAATGTTTGTCAATTGTTACAA  
 s\_CM021990.1:35056255 : TGTGCCTATCATAAATAAAT-----AAAAAATT-AAAAAAAAAAAAATTTAAAGGAAAAATAATGAAGTGACTATTATGATAATTATTTTCATATTATTTCTAGA  
 b\_CM000029.4:34574364 : TGTGCCTATCATAAATAAAT-----AAAAAATT-AAAAAAAAAAAAATTTAAAGGAAAAATAATGAAGTGACTATTATGATAATTATTTTCATATTATTTCTAGA  
 b\_CM000030.4:32702878 : TGTGCCTATCATAAATAAAT-----AAAAAATT-AAAAAAAAAAAAAAAAAAAAAGCAATAAAGGTGGGAGAAATACCCCAGCTGGAGAAGGACCAAGG  
 s\_CM021965.1:52147775 : TGTGCCTATCATAAATAAAT-----AAAAAATT-AAAAAAAAAATTTTTTTTAAAAAGGGAATGTTAAAGTCTTGTCTACTTATAAATAGAATATTATTT  
 d\_CM016572.1:51525463 : TGTGCCTATCATAAATAAAT-----AAAAAATT-AAAAAAAAAATTTTTTTTAAAAAGGGAATGTTAAAGTCTTGTCTACTTATAAATAGAATATTATTT  
 b\_CM000023.4:38752119 : TGTGCCTATCATAAATAAAT-----AAAAAATT-AAAAAAAAAAAAAGAAATATATTTTTCAGTTTACTTGACCAGGTTCAAAATTTCCCTCAGATAG  
 s\_CM021995.1:32404702 : TGTGCCTATCATAAATAAAT-----AAAAAATT-AAAAAAAAAATTAAAAAATAAAAAAATCCCTGCAATGGTCAACTATTGCATTTAAATGCAATAAT  
 b\_CM000034.4:41229417 : TGTGCCTATCATAAATAAAT-----AAAAAATT-AAAAAAAAAATTAAAAAATAAAAAAATCCCTGCAATGGTCAACTATTGCATTTAAATGCAATAAT  
 d\_CM016602.1:32172425 : TGTGCCTATCATAAATAAAT-----AAAAAATT-AAAAAAAAAATTAAAAAATAAAAAAATCCCTGCAATGGTCAACTATTGCATTTAAATGCAATAAT  
 s\_CM021997.1:14667324 : TGTGCCTATCATAAATAAAT-----AAAAAATAAATTAAAAAATAAAAAAATTTAAAAAATAAAAAATAAAAAATAAAAAATAAAAAATAAAAA  
 d\_CM016604.1:14565027 : TGTGCCTATCATAAATAAAT-----AAAAAATAAATTAAAAAATAAAAAAATTTAAAAAATAAAAAATAAAAAATAAAAAATAAAAAATAAAAA  
 s\_CM021963.1:71894134 : TGTGCCTATCATAAATAAAT-----AAAAAATT-AAAAAAAAAATTTTTTTTAAAAATTAATTAATTAATTTTAAAGATTTTATTTATTTATTTTCATGAGAC  
 s\_CM021983.1:45943175 : TGTGCCTATCATAAATAAAT-----AAAAAATT-AAAAAAAAAAAAAGAACGTAGCAGGTTTGTAAATATTGATCTTAAATCCCCTGAAAACATAGGATT  
 s\_CM021963.1:18318682 : TGTGCCTATCATAAAT-----AAAAAATT-AAAAAAAAAATTAAAAAATAAAAAAATCAAAAGGACAAAATACATATGCCTTCCCTTTTCAAC  
 b\_CM000002.4:16472404 : TGTGCCTATCATAAAT-----AAAAAATT-AAAAAAAAAATTAAAAAATAAAAAAAT-----AAAGGACAAAATACATATGCCTTCCCTTTTCAAC  
 s\_CM021981.1:32911909 : TGTGCCTATCATAAATAAAT-----AAAAAATT-AAAAAAAAATGTATAAAATGTGCCATAACCACAGCTGAATGCTATGTGAGCATTTTACCTTGCT  
 d\_CM016588.1:32382961 : TGTGCCTATCATAAATAAAT-----AAAAAATT-AAAAAAAAAATGTATAAAATGTGCCATAACCACAGCTGAATGCTATGTGAGCATTTTACCTTGCT  
 b\_CM000020.4:32582772 : TGTGCCTATCATAAATAAAT-----AAAAAATT-AAAAAAAAATGTATAAAATGTGCCATAACCACAGCTGAATGCTATGTGAGCATTTTACCTTGCT  
 s\_CM021991.1:17604839 : TGTGCCTATCATAAATAAAT-----TAAAAAATT-----AAAAAATAGAAAGGTACAGTTTTGTGTCACTAACAGAACATGCCAATACAACGTGTAAGTA  
 d\_CM016598.1:17380206 : TGTGCCTATCATAAATAAATTTAAAAAATT-AAAAAATAAATAGAAAGGTACAGTTTTGTGTCACTAACAGAACATGCCAATACAACGTGTAAGTA  
 s\_CM021972.1:23265552 : TGTGCCTATCATAAATAAAT-----AAAAAATAAATTAGAACAAATTTGGGACCTTTAGCCAAGATGACAGTTGACACTAACTGGTTTTTGTATTG  
 d\_CM016579.1:22756425 : TGTGCCTATCATAAATAAAT-----AAAAAATAAATTAGAACAAATTTGGGACCTTTAGCCAAGATGACAGTTGACACTAACTGGTTTTTGTATTG  
 b\_CM000011.4:22000418 : TGTGCCTATCATAAATAAAT-----AAAAAATAAATTAGAACAAATTTGGGACCTTTAGCCAAGATGACAGTTGACACTAACTGGTTTTTGTATTG  
 s\_CM021988.1:9926312 : TGTGCCTATCATAAATAAAT-----AAAAAATT-AAAAAAAAAATTCATTATATCTTAGGAATAACATAGACATGTTTCTCTCTCTCTGTTTCCCTC  
 b\_CM000027.5:10401007 : TGTGCCTATCATAAATAAAT-----AAAAAATT-AAAAAAAAAATTCATTATATCTTAGGAATAACATAGACATGTTTCTCTCTCTCTGTTTCTCTC  
 b\_CM000008.4:72800272 : TGTGCCTATCATAAATAAAT-----AAAAAATT-AAAAAAAAAATTTTAAAAATAACATATATTACATATACATATATAATTTTTTAAATCAGGACTA  
 s\_CM021970.1:18974382 : TGTGCCTATCATAAATAAAT-----AAAAAATT-AAAAAAAAAATTTTAAAAAAGAAATTCACATTGATGAAGCAGTATCTACTGTACAGGCCCT  
 s\_CM021998.1:30009360 : TGTGCCTATCATAAATAAATTTA-AAAAAATT-AAAAAAAAATAAATAAAACATTATT-----AAAAAATAGTAACTTCTACACAGTAGAACACATTGTT  
 d\_CM016605.1:30057161 : TGTGCCTATCATAAATAAATTTA-AAAAAATT-AAAAAAAAATAAATAAAACATTATT-----AAAAAATAGTAACTTCTACACAGTAGAACACATTGTT  
 b\_CM000037.4:30888146 : TGTGCCTATCATAAATAAATTTA-AAAAAATT-AAAAAAAAATAAATAAAACATTATT-----AAAAAATAGTAACTTCTACACAGTAGAACACATTGTT  
 b\_CM000032.5:23742260 : TGTGCCTATCATAAATAAAT-----AAAAAATT-AAAAAAAAAATAAAAAAATAAAAAAATAAAAAAATAAAAAAATAAAAAAATAAAAAAATAAAAA

**Figure S6.** Members of the Can\_b2 tribe 1 in the three dog breeds. The upper sequence “chr29 Can” (chr29:16532880-16533057, German Shepherd) was used as the search query. The letter prefix in sequence names indicates the genome where they are

present (s, German Shepherd; d, Great Dane; and b, Boxer). Sequence names are given in black if present in all three breeds, while those available in one or two genomes are given in blue and violet, respectively. Rudimentary terminators (TT and TTT) are marked green; TSDs are underlined. Notice that no copies contain a functional terminator ( $T_{>3}$ ) in the proper place, which indicates that their retrotransposition proceeds without polyadenylation of pol III transcripts. Can copies from orthologous loci were not combined to demonstrate their sequence conservation and absence of terminators in either breed.
