# Supplementary material for: Tail Wags Dog’s SINE: Retropositional Mechanisms of Can SINE Depend on Its A-Tail Structure
Source: MDPI journal article supplement (doi:10.3390/biology11101403), 2022-09-26
Supplement: s1 [file s1]

Can\_1\_in\_F8 : CGAACACAGCTTTTAAAGGAAAGACACCGGGATCCCTGG-TGGCGCAGCGGTTTGGCGCCTGCCTTTGGCCCGGGGCACGATCCTGGAGACCCGGGATCGAATCCACAGTCGGGCTCCCAGTGCATGGAGCTTGCCTTC

chr19 13878744 : TAATGCTTTTAAATAGAAATTTGAAGAAACGGGATCCCTGGGTGGCGCAGCGGTTTGGCGCCTGCCTTTGGCCCGGGGCACGATCCTGGAGACCCGGGATCGAATCCACAGTCGGGCTCCCAGTGCATGGAGCTTGCCTTC

chr4 32931588 : CGTGAGATGCCTGAGGAAAGAAAGTTTCAAGGATCCCTGGGTGGCGCAGCGGTTTGGCGCCTGCCTTTGGCCCGGGGCACGATCCTGGAGACCCGGGATCGAATCCACAGTCGGGCTCCCAGTGCATGGAGCTTGCCTTC

chr12 42108376 : AGAAGAATTTTTTAAATATGAAATACCTGGGATCCCTGGGTGGCGCAGCGGTTTGGCGCCTGCCTTTGGCCCGGGGCACGATCCTGGAGACCCGGGATCGAATCCACAGTCGGGCTCCCAGTGCATGGAGCTTGCCTTC

chr15 45574372 : TCAAAATATAACACTAAAGAAAGTCATCAAAGGATCCCTGGGTGGCGCAGCGGTTTGGCGCCTGCCTTTGGCCCGGGGCACGATCCTGGAGACCCGGGATCGAATCCACAGTCGGGCTCCCAGTGCATGGAGCTTGCCTTC

chr2 5294782 : TTGGTATTAACAATGAAATTCACACGGGAGGGATCCCTGGGTGGCGCAGCGGTTTGGCGCCTGCCTTTGGCCCGGGGCACGATCCTGGAGACCCGGGATCGAATCCACAGTCGGGCTCCCAGTGCATGGAGCTTGCCTTC

chr16 57112821 : CTTCCACCCCGCTGTTAAACTGATGCTGCGGGATCCCTGGGTGGCGCAGCGGTTTGGCGCCTGCCTTTGGCCCGGGGCACGATCCTGGAGACCCGGGATCGAATCCACAGTCGGGCTCCCAGTGCATGGAGCTTGCCTTC

chrUn 26084 : CATCTAAGTACTGATAAATATAGATGGAGGGGATCCCTGGGTGGCGCAGCGGTTTGGCGCCTGCCTTTGGCCCGGGGCACGATCCTGGAGACCCGGGATCGAATCCACAGTCGGGCTCCCAGTGCATGGAGCTTGCCTTC

Can\_1\_in\_F8 : TCCCCTCTGCCTGTGTCTCTCTGCCTCTCTCTCTCTCTCTGTGACTATCATATAAATAAAAGTTAAAAAATTTAAATTTAAAGGAAAGACACCATTGTGCCCTGGGCC----

chr19 13787844 : TCCCCTCTGCCTGTGTCTCTCTGCCTCTCTCTCTCTCTCTGTGACTATCATATAAATAAAAGTTAAAAAATTTAAAAAAGAAATTTGAAGAACAGATCTCTTTAA

chr4 32931588 : TCCCCTCTGCCTGTGTCTCTGCCTCTCTCTCTCTCTCTGTGACTATCATATAAATAAAAGTTAAAAAATTTAAAAAAGAAAGTTCAATAGTCTGATCGTATGGTAGGAAACACAA

chr12 42108376 : TCCCCTCTGCCTGTGTCTCTGCCTCTCTCTCTCTCTCTGTGACTATCATATAAATAAAAGTTAAAAAATTTAAAAAATAATGAAATACCTAGCAAGTAAAGATGGAAGCTGTAAGAAACAAAC

chr15 45574372 : TCCCCTCTGCCTGTGTCTCTGCCTCTCTCTCTCTCTCTGTGACTATCATATAAATAAAAGTTAAAAAATTTAAAAAAGAAAGTATCAAAATCACAAGAAAGAGAGTAAAGTAGAAAG

chr2 5294782 : TCCCCTCTGCCTGTGTCTCTGCCTCTCTCTCTCTCTCTGTGACTATCATATAAATAAAAGTTAAAAAATTTAAAAAAGAAATTCACAGGATATGTATGTGAATAGCAAAATGGATAT

chr16 57112821 : TCCCCTCTGCCTGTGTCTCTGCCTCTCTCTCTCTCTCTGTGACTATCATATAAATAAAAGTTAAAAAATTTAAAAAAGAAATTCAGTGTGAGATCTGGCTGTCCACATCTGGC

chrUn 26084 : TCCCCTCTGCCTGTGTCTCTGCCTCTCTCTCTCTCTGTGACTATCATATAAATAAAAGTTAAAAAATTTAAAAAAGAAATTCAGTGTGAGATCTGGCTGTCCACATCTGGC

Can\_2\_in\_F8 : GAAGAAACCTGATTAAAAAATTTCTAGTTCGGGATCCCTGGGTGGCGCAGCGGTTTGGCGCCTGCCTTTGGCCCAGGGCGCGATCCTGGAGACCCGGGATCGAATCCCACATCGGGCTCCTGGTGCATGGAGCCTGCTTC

chrX\_54829244 : GATTTTTTTTTTTTTTGAAGCACGGTCATGGGATCCCTGGGTGGCGCAGCGGTTTGGCGCCTGCCTTTGGCCCAGGGCGCGATCCTGGAGACCCGGGATCGAATCCCACATCGGGCTCCTGGTGCATGGAGCCTGCTTC

chrX\_62403822 : -AGAGTTTTATAGTTTAAATCTTAAAGTCTAGGATCCCTGGGTGGCGCAGCGGTTTGGCGCCTGCCTTTGGCCCAGGGCGCGATCCTGGAGACCCGGGATCGAATCCCACATCGGGCTCCTGGTGCATGGAGCCTGCTTC

chrX\_88161334 : GCTCATCGTTAAAAAACAACCTGAAAGGGATCCCTGGGTGGCGCAGCGGTTTGGCGCCTGCCTTTGGCCCAGGGCGCGATCCTGGAGACCCGGGATCGAATCCCACATCGGGCTCCTGGTGCATGGAGCCTGCTTC

chr25\_10034791 : ATAGATTAAAGCGCTAGAAAAATTTTGGCGGATCCCTGGGTGGCGCAGCGGTTTGGCGCCTGCCTTTGGCCCAGGGCGCGATCCTGGAGACCCGGGATCGAATCCCACATCGGGCTCCTGGTGCATGGAGCCTGCTTC

chr6\_75277277 : GGCCTCCCATGGAATTAAGAAAAATGCTGCTGGGATCCCTGGGTGGCGCAGCGGTTTGGCGCCTGCCTTTGGCCCAGGGCGCGATCCTGGAGACCCGGGATCGAATCCCACATCGGGCTCCTGGTGCATGGAGCCTGCTTC

chr8\_25747996 : AGCAGTATAGTGATTAAAAAATTTATAACAAGGATCCCTGGGTGGCGCAGCGGTTTGGCGCCTGCCTTTGGCCCAGGGCGCGATCCTGGAGACCCGGGATCGAATCCCACATCGGGCTCCTGGTGCATGGAGCCTGCTTC

chrX\_77138179 : TGCAGATTATTATTATAAATTTCTATATTCAAGGATCCCTGGGTGGCGCAGCGGTTTGGCGCCTGCCTTTGGCCCAGGGCGCGATCCTGGAGACCCGGGATCGAATCCCACATCGGGCTCCTGGTGCATGGAGCCTGCTTC

chr1\_41070406 : -TAAATAAAATTTTAAAAAACAACAGACAAGGATCCCTGGGTGGCGCAGCGGTTTGGCGCCTGCCTTTGGCCCAGGGCGCGATCCTGGAGACCCGGGATCGAATCCCACATCGGGCTCCTGGTGCATGGAGCCTGCTTC

chrUn\_9932 : GTGCTACTTTGTGTAAAAAAATTCATCATAGGGATCCCTGGGTGGCGCAGCGGTTTGGCGCCTGCCTTTGGCCCAGGGCGCGATCCTGGAGACCCGGGATCGAATCCCACATCGGGCTCCTGGTGCATGGAGCCTGCTTC

chrUn\_71481 : CAGGGAGATTAGAAATCAAAACCACATATAGGATCCCTGGGTGGCGCAGCGGTTTGGCGCCTGCCTTTGGCCCAGGGCGCGATCCTGGAGACCCGGGATCGAATCCCACATCGGGCTCCTGGTGCATGGAGCCTGCTTC

[illegible]

Can in ASIP :  
AATTCTAGAGAATTT CAGGAAGATGGTCAGGTAAGAAACACATTAGAATCAAATTTGCA GGGATCCCTGGGTGGCGCAGCGGTTT AGCGGCTTGCCCTTTTGGCCCCAGGGCGCGCATCCTGGAGACCCGGGATCAAATCCCACG

CM021970.1:45110505:  
 CCACCTTACATGGTCTCCCTGACTCAGGTGTTAAGTTGCTGTTAAGAGTGAGGTACAGGTGGGATCCCTGGGTGGCGCAGCGGTTTAGCGCCTGCCTTTGGCCCAGGGCGCGATCCTGGAGACCCGGGATCAAATCCCACG  
 CM021969.1:60195958:  
 CTGCACCAAAGGCAAGGTAAAGGACGGACAAAGAATATATCCTTTAAAACTTTGATTCTGGGATCCCTGGGTGGCGCAGCGGTTTAGCGCCTGCCTTTGGCCCAGGGCGCGATCCTGGAGACCCGGGATCAAATCCCACG  
 CM021970.1:41526014:  
 TTATCACAAACAGAATGAAAGATGTCTTCTTTAGCTCAACTAAAGATCACAAAGTTTGTGGGATCCCTGGGTGGCGCAGCGGTTTAGCGCCTGCCTTTGGCCCAGGGCGCGATCCTGGAGACCCGGGATCAAATCCCACG  
 CM021962.1:70217506:  
 ATTAATGCAATCAGCGATATGAACAGGCTAGAGAAGAAAAGCATTGGAATAGAAACATAGGGATCCCTGGGTGGCGCAGCGGTTTAGCGCCTGCCTTTGGCCCAGGGCGCGATCCTGGAGACCCGGGATCAAATCCCACG  
 CM021980.1:44692371:  
 TGGTGCTAAATGACCTTTGGAATTTTCTTTAGGATGGTATTTACAGATAAGAAGTCCAGGGATCCCTGGGTGGCGCAGCGGTTTAGCGCCTGCCTTTGGCCCAGGGCGCGATCCTGGAGACCCGGGATCAAATCCCACG  
 CM021991.1:22294944:  
 GTCTGCCAAAATGACGTGATTGTCTATCTTGATTATGGTCAAACATTAAATTGTTAATGTGGGATCCCTGGGTGGCGCAGCGGTTTAGCGCCTGCCTTTGGCCCAGGGCGCGATCCTGGAGACCCGGGATCAAATCCCACG  
 CM021977.1:17215410:  
 GCCAAAATCTCTGTAGTAATAAGTACCTTCAATTAAAGAAAAATAAAAAATTAACATCCAGGGATCCCTGGGTGGCGCAGCGGTTTAGCGCCTGCCTTTGGCCCAGGGCGCGATCCTGGAGACCCGGGATCAAATCCCACG  
 CM021985.1:23875635:  
 AATTCTAGAGAAATTCAGGAAGATGGTCAGGTAAGAAACACATTAGAATCAAATTTGCAAGGATCCCTGGGTGGCGCAGCGGTTTAGCGCCTGCCTTTGGCCCAGGGCGCGATCCTGGAGACCCGGGATCAAATCCCACG  
 JAAHUQ010001485.1 :  
 CCAAGTCCCTGGCAACGGAGAGATGGACCAGATATATTTCTTGCTCAGAAGTGACTTTCAAGGATCCCTGGGTGGCGCAGCGGTTTAGCGCCTGCCTTTGGCCCAGGGCGCGATCCTGGAGACCCGGGATCAAATCCCACG  
 CM021976.1:54831480:  
 ACCCATCCAGGCAGACACAAACACCTGCATATATACATACATAAAAAATAGAGACAGATTGGGATCCCTGGGTGGCGCAGCGGTTTAGCGCCTGCCTTTGGCCCAGGGCGCGATCCTGGAGACCCGGGATCAAATCCCACG  
 CM021986.1:29276547:  
 CTTTCTGATTTAGTAATTTGGTGTGCGCCACGAGGATTTTTTTTAAAAAAGAAAAATGTAAGGATCCCTGGGTGGCGCAGCGGTTTAGCGCCTGCCTTTGGCCCAGGGCGCGATCCTGGAGACCCGGGATCAAATCCCACG

Can in ASIP : TCAGGCTCCCGGTGCATGGAGCCTGCTTCTCCCTCTGCCTGTGTCTCTGC-----CTCTCTCTCTCTCTCTC--  
 TGTGTGACTATCATAAATAAATGAAAAAAAAAAAAAAAAAGAAAAAAAAAAAAAAAAA  
 CM021970.1:45110505: TCAGGCTCCCGGTGCATGGAGCCTGCTTCTCCCTCTGCCTGTGTCTCTGC-----CTCTCTCTCTCTCTCTCTC--  
 CTCTCTCTCTCTCTCTCTCTCTCTCTGTGTGACTATCATAAATAAATGAAAAAAAAAAAAAAAAAGACTGAGGTACAGGGCAAG  
 CM021969.1:60195958: TCAGGCTCCCGGTGCATGGAGCCTGCTTCTCCCTCTGCCTGTGTCTCTGC-----CTCTCTCTCTCTCTCTCTC--  
 TGTGTGACTATCATAAATAAATAAAAATTTAAAAAAATAAAAATAAAAATAAACTTTG  
 CM021970.1:41526014: TCAGGCTCCCGGTGCATGGAGCCTGCTTCTCCCTCTGCCTGTGTCTCTGC-----CTCTCTCTCTCTCTCTCTC--  
 TGTGTGACTATCATAAATAAATGAAAAAAAAAAAAAAAAATGAAAAAAAAAATGATCACAAGT  
 CM021962.1:70217506: TCAGGCTCCCGGTGCATGGAGCCTGCTTCTCCCTCTGCCTGTGTCTCTGC-----CTCTCTCTCTCTCTCTCTC--  
 TGTGTGACTATCATAAATAAATAAAAATTTAAAAAAATGAAATAGAAACATAAAATG  
 CM021980.1:44692371: TCAGGCTCCCGGTGCATGGAGCCTGCTTCTCCCTCTGCCTGTGTCTCTGC-----CTCTCTCTCTCTCTCTCTC--  
 TGTGTGACTATCATAAATAAATGAAAAAAAAAAAAAAAAATGAAAAAAAAAATGAAAAAAAAA  
 CM021991.1:22294944: TCAGGCTCCCGGTGCATGGAGCCTGCTTCTCCCTCTGCCTGTGTCTCTGC-----CTCTCTCTCTCTCTCTCTC--  
 TGTGTGACTATCATAAATAAATGAAAAAAAAAAAAAAAAATAAATAATGTTAATGTAAACATA  
 CM021977.1:17215410: TCAGGCTCCCGGTGCATGGAGCCTGCTTCTCCCTCTGCCTGTGTCTCTGC-----CTCTCTCTCTCTCTCTCTC--  
 TGTGTGACTATCATAAATAAATGAAAAAAAAAAAAAAAAATGAAAAAAAAAATGAAAAAAAAA  
 CM021985.1:23875635: TCAGGCTCCCGGTGCATGGAGCCTGCTTCTCCCTCTGCCTGTGTCTCTGC-----CTCTCTCTCTCTCTCTCTC--  
 TGTGTGACTATCATAAATAAATGAAAAAAAAAAAAAAAAAGAAAAAAAAAAAAAAAAA  
 JAAHUQ010001485.1 : TCAGGCTCCCGGTGCATGGAGCCTGCTTCTCCCTCTGCCTGTGTCTCTGC-----CTCTCTCTCTCTCTCTC--  
 TGTGTGACTATCATAAATAAATGAAAAAAAAAAAAAAAAAGACTGAGGTACAGGGCAAG  
 CM021976.1:54831480: TCAGGCTCCCGGTGCATGGAGCCTGCTTCTCCCTCTGCCTGTGTCTCTGC-----CTCTCTCTCTCTCTCTCTC--  
 TGTGTGACTATCATAAATAAATGAAAAAAAAAATGAAAAAAAAATAGAGACAGATT  
 CM021986.1:29276547: TCAGGCTCCCGGTGCATGGAGCCTGCTTCTCCCTCTGCCTGTGTCTCTGC-----CTCTCTCTCTCTCTCTCTC--  
 TGTGTGACTATCATAAATAAATGAAAAAAAAAATGAAAAATGTAAACTGTAGTGA

Can in ASIP : AAAAAAAAAAAAAAAAAAGAAATCAAATTTGCAAAAGATAAGACAAATGTAGATTCTTGAAATTAAGCA  
 CM021970.1:45110505: CCACTCTGGTGGGCTTTCTTACATAGTGAGCTTTCTGCAACATTTTATGCTCAAACCTTCATGGTTA  
 CM021969.1:60195958: ATTCTTGTAAACTCCAATTAGTAATTTGAAAGAGACCTTACAGCATCTCTGTACCAGAGACTTAGAGTT  
 CM021970.1:41526014: TTGTGCTACTCAATAATCTTCCATAAATGCTCTGGAGCAGCAACAAAAACAGCTGACATCAAAAAC  
 CM021962.1:70217506: AATTTGACAAATCCAATATGCATTATTATACACAAAAAACTCTCTCAGGAAATAAGGTATAGAG  
 CM021980.1:44692371: AAGAGTCCAAAGTTAATGAGGATTTCTTCTTGAATGTTGTCTGAGAGAAAGACCTTCTCTGCC

D

Can\_in\_ATP1B2 :TCCCTCTGCCTGTGTCTCTGCCTCTCTCTCTCTCT--GTGACTATCATGAATAAAATAAAATAAAA-TCTTTTAAAAAAAAAAAAAAAAAAAAAAAAAAAAAAAAAGAGAGGAGGATGAAGGCTAGGGAGGAGG

chr36\_14925349 :TCCCTCTGCCTGTGTCTCTGCCTCTCTCTCTCTCT--GTGACTATCATGAATAAAATAAAATAAAA-TCTTTTAAAAAAAAAAAAAATAGGGTCTTTCTTAAAGAGACAAGCAGGAGCCAGTAAATTTCTAGT

chrX\_19953333 :TCCCTCTGCCTGTGTCTCTGCCTCTCTCTCTCTCTCTGTGACTATCATGAATAAAATAAAATAAAA-TCTTTTAAAAAATAAAAAATAAATAAAAAAATAAAATGAGGTTGAGAGGCCCTGAAGGGGGAGCT

# E

```

Can_in_PTFLA : TC CCTCTG CCTGTG TCTCTG CCTCTCTCTCTATCTGTGTGACTATCATAAAATAAATAAAAAA TTA AAAAAAAAAA AATTT AAAAAAAAAA TTT AAAAAAAAAAAAAAAAAA CCTTGTGTGTTCTTTTTC
chr6 751818 : TC CCTCTG CCTGTG TCTCTG CCTCTCTCTCTATCTGTGTGACTATCATAAAATAAATAAAAAA TTA AAAAAAAAAA TAAATAAATAAATAGAAAATTCCTTCCATAAGGGTGACTTTCTGGGG -----
chr7 776392 : TC CCTCTG CCTGTG TCTCTG CCTCTCTCTCTATCTGTGTGACTATCATAAAATAAATAAAAAA TTA AAAAAAAAAA TTTCTTTTAAATCAGGTGTGTTTCTTTTCTTAGAAGGAGAGTGTCTGGGG -----
chr10 46880259 : TC CCTCTG CCTGTG TCTCTG CCTCTCTCTCTATCTGTGTGACTATCATAAAATAAATAAAAAA TTA AAAAAAAAAA TTTCTGTCTTTTATCATTTAGGGAAAGTGATCTTTGGCCGACGAGGAGAGCAT -----
chr14 6003797 : TC CCTCTG CCTGTG TCTCTG CCTCTCTCTCTATCTGTGTGACTATCATAAAATAAATAAAAAA TTA AAAAAAAAAAAAAAAAAA AGGAACGCTGAAGCTCATTAACTCAGACAAGACAGGAGCTAGTGAGGAGAA -----
chr33 24974268 : TC CCTCTG CCTGTG TCTCTG CCTCTCTCTCTATCTGTGTGACTATCATAAAATAAATAAAAAA TTA AAAAAAAAAA TAAATAAATAA TAA TAA AATAATTTATAACAGAGATGCCCTGGGTGGCTCAGC -----
chrUn MU018737 : TC CCTCTG CCTGTG TCTCTG CCTCTCTCTCTATCTGTGTGACTATCATAAAATAAATAAAAAA TTA AAAAAAAAAA TAAATAAATAA TAA AATAAAGAGTTAAATAAGCGTATGCTACGATTCCCAAATTGCA -----

```

**F**

```
Can_in_STK38L : TCCCTCTGCGCTGTGTCTCTGCGCTCTCTCTCTCTCTCACTGTGTGCCTATCATAAATGAATAAAAGTTTAAAAAAAAAAATTTTAAAAAAAAAAAAAAAAAAAAAAAAAAGAACTCTGTTTCCCTTCGGGCA
chr34 282972 : TCCCTCTGCGCTGTGTCTCTGCGCTCTCTCTCTCTCTCACTGTGTGCCTATCATAAATGAATAAAAGTTTAAAAAAAAATTTTAAAAAAAAAGACTTTTAAAGATCTATCTTAATGTAAAAACATTAGTTGGGAG
chr8 36794809 : TCCCTCTGCGCTGTGTCTCTGCGCTCTCTCTCTCTCTCACTGTGTGCCTATCATAAATGAATAAAAGTTTAAAAAAAAAAATCTCTAGAACTCTAGAATTTTCAAAGTTGAAGGGGAACCTTGAACATCAGCC--
chr14 34036119 : TCCCTCTGCGCTGTGTCTCTGCGCTCTCTCTCTCTCTCACTGTGTGCCTATCATAAATGAATAAAAGTTTAAAAAAAAAAAAAAAAATAATAAATTTCTTTCAAAAATTAATGGATTAATAAAGGAAACAGTA
```

## G

Can in FAM161 : CTTTCCTTTTCACTCTTTCTAAATCAAAATAAAGGATCCCTGGGTGGCGCAGCGGTTTGGCGCCTGCCTTTGGCCAGGGCGCGATCCTGGAGACCCGGGATCGAATCCCACATCGGGCTCCCGGTGCATGGAGCCTGCTTCTCCCTCT

CM021962.1:34955691 : TAATCAAAGACTCACATGAAATGAAAAATAATGGGATCCCTGGGTGGCGCAGCGGTTTGGCGCCTGCCTTTGGCCAGGGCGCGATCCTGGAGACCCGGGATCGAATCCCACATCGGGCTCCCGGTGCATGGAGCCTGCTTCTCCCTCT

CM021986.1:11818367 : ATTTTCATCTtttttAAGTTAAAAAATAAAACCGGATCCCTGGGTGGCGCAGCGGTTTGGCGCCTGCCTTTGGCCAGGGCGCGATCCTGGAGACCCGGGATCGAATCCCACATCGGGCTCCCGGTGCATGGAGCCTGCTTCTCCCTCT

CM021983.1:36632009 : CTTTCAGGTAttatTAAGAATAACTATGAACGGGATCCCTGGGTGGCGCAGCGGTTTGGCGCCTGCCTTTGGCCAGGGCGCGATCCTGGAGACCCGGGATCGAATCCCACATCGGGCTCCCGGTGCATGGAGCCTGCTTCTCCCTCT

CM021964.1:13942518 : AGATGCAGAGCATTATTCAAGAGTTGATAATTGGGATCCCTGGGTGGCGCAGCGGTTTGGCGCCTGCCTTTGGCCAGGGCGCGATCCTGGAGACCCGGGATCGAATCCCACATCGGGCTCCCGGTGCATGGAGCCTGCTTCTCCCTCT

CM021972.1:8203613 : ATAAAGATGGTTGATTTTAGAAAAACAACCTGCTGGGATCCCTGGGTGGCGCAGCGGTTTGGCGCCTGCCTTTGGCCAGGGCGCGATCCTGGAGACCCGGGATCGAATCCCACATCGGGCTCCCGGTGCATGGAGCCTGCTTCTCCCTCT

CM021972.1:38978442 : CGGTAATAATGCAGATGTAAGAATGTTTATAGTTGGGATCCCTGGGTGGCGCAGCGGTTTGGCGCCTGCCTTTGGCCAGGGCGCGATCCTGGAGACCCGGGATCGAATCCCACATCGGGCTCCCGGTGCATGGAGCCTGCTTCTCCCTCT

CM021975.1:12729399 : AAGGCATAACACACTTTAATAAAAAATAGATCAGGATCCCTGGGTGGCGCAGCGGTTTGGCGCCTGCCTTTGGCCAGGGCGCGATCCTGGAGACCCGGGATCGAATCCCACATCGGGCTCCCGGTGCATGGAGCCTGCTTCTCCCTCT

CM021969.1:33998971 : CCTGGGTGGCGCATGGGATCCCTGGGTGGCGCAGGATCCCTGGGTGGCGCAGCGGTTTGGCGCCTGCCTTTGGCCAGGGCGCGATCCTGGAGACCCGGGATCGAATCCCACATCGGGCTCCCGGTGCATGGAGCCTGCTTCTCCCTCT

CM021971.1:57427098 : CACAGTGCTAAAAATAGTAGTTAAAAATAGTTCAGGGATCCCTGGGTGGCGCAGCGGTTTGGCGCCTGCCTTTGGCCAGGGCGCGATCCTGGAGACCCGGGATCGAATCCCACATCGGGCTCCCGGTGCATGGAGCCTGCTTCTCCCTCT

CM021965.1:63222756 : GGTGGCATATCTCTGCTTAAAAACAATATGGTTGGGATCCCTGGGTGGCGCAGCGGTTTGGCGCCTGCCTTTGGCCAGGGCGCGATCCTGGAGACCCGGGATCGAATCCCACATCGGGCTCCCGGTGCATGGAGCCTGCTTCTCCCTCT

CM021970.1:45571260 : GATACCAAGAAGTGGTGAAAAAGCACAACTAAGGATCCCTGGGTGGCGCAGCGGTTTGGCGCCTGCCTTTGGCCAGGGCGCGATCCTGGAGACCCGGGATCGAATCCCACATCGGGCTCCCGGTGCATGGAGCCTGCTTCTCCCTCT

CM022000.1:57918954 : AACCAATTAGCCAACTTTATTAAGAAAGAGAGAGGGATCCCTGGGTGGCGCAGCGGTTTGGCGCCTGCCTTTGGCCAGGGCGCGATCCTGGAGACCCGGGATCGAATCCCACATCGGGCTCCCGGTGCATGGAGCCTGCTTCTCCCTCT

CM021965.1:57990141 : AGTATGTTTTCTCTTTTGTAAAAAGGCACATTGGGATCCCTGGGTGGCGCAGCGGTTTGGCGCCTGCCTTTGGCCAGGGCGCGATCCTGGAGACCCGGGATCGAATCCCACATCGGGCTCCCGGTGCATGGAGCCTGCTTCTCCCTCT

CM021987.1:23159322 : TGTGCAGTACTTGAATTAATAAGACAAAGAGGGATCCCTGGGTGGCGCAGCGGTTTGGCGCCTGCCTTTGGCCAGGGCGCGATCCTGGAGACCCGGGATCGAATCCCACATCGGGCTCCCGGTGCATGGAGCCTGCTTCTCCCTCT

CM021963.1:53601695 : AATATTACAGCTCACAAAAGAACACCTAAACTGGGATCCCTGGGTGGCGCAGCGGTTTGGCGCCTGCCTTTGGCCAGGGCGCGATCCTGGAGACCCGGGATCGAATCCCACATCGGGCTCCCGGTGCATGGAGCCTGCTTCTCCCTCT

CM021991.1:3332171 : AATTTACATATCCTCATTAAAGAACACAGACTAGGATCCCTGGGTGGCGCAGCGGTTTGGCGCCTGCCTTTGGCCAGGGCGCGATCCTGGAGACCCGGGATCGAATCCCACATCGGGCTCCCGGTGCATGGAGCCTGCTTCTCCCTCT

CM021981.1:4892108 : CCACACAAAGTATCATTAAAAAAGAAAGAGGGATCCCTGGGTGGCGCAGCGGTTTGGCGCCTGCCTTTGGCCAGGGCGCGATCCTGGAGACCCGGGATCGAATCCCACATCGGGCTCCCGGTGCATGGAGCCTGCTTCTCCCTCT

CM021986.1:37118882 : TCTCAGTAATTTGCTATAAAGACAGCGATTAGCGGATCCCTGGGTGGCGCAGCGGTTTGGCGCCTGCCTTTGGCCAGGGCGCGATCCTGGAGACCCGGGATCGAATCCCACATCGGGCTCCCGGTGCATGGAGCCTGCTTCTCCCTCT

CM021976.1:16004606 : CTTGGTTGGGGCTTGCTCAAAACCTAAGGCAGAGGATCCCTGGGTGGCGCAGCGGTTTGGCGCCTGCCTTTGGCCAGGGCGCGATCCTGGAGACCCGGGATCGAATCCCACATCGGGCTCCCGGTGCATGGAGCCTGCTTCTCCCTCT

CM021998.1:22750779 : TGATCGGAGAAGGTCACTCAGAAAGAGGTGTTGGGATCCCTGGGTGGCGCAGCGGTTTGGCGCCTGCCTTTGGCCAGGGCGCGATCCTGGAGACCCGGGATCGAATCCCACATCGGGCTCCCGGTGCATGGAGCCTGCTTCTCCCTCT

CM021970.1:17501127 : ATGGATATTTTATACATAGAACACAACTGCTTAGGATCCCTGGGTGGCGCAGCGGTTTGGCGCCTGCCTTTGGCCAGGGCGCGATCCTGGAGACCCGGGATCGAATCCCACATCGGGCTCCCGGTGCATGGAGCCTGCTTCTCCCTCT

CM021963.1:135702036 : ATATAGAAATCTAGATTGAATTAACCTTTTCTTGGGATCCCTGGGTGGCGCAGCGGTTTGGCGCCTGCCTTTGGCCAGGGCGCGATCCTGGAGACCCGGGATCGAATCCCACATCGGGCTCCCGGTGCATGGAGCCTGCTTCTCCCTCT

CM021972.1:32305978 : CATTTATTTGGACACTTTTTTAAAAATCTATTTAGGATCCCTGGGTGGCGCAGCGGTTTGGCGCCTGCCTTTGGCCAGGGCGCGATCCTGGAGACCCGGGATCGAATCCCACATCGGGCTCCCGGTGCATGGAGCCTGCTTCTCCCTCT

CM021983.1:53301297 : ATAGTATGGAGTTTCTTCAAAAATTAATAAATAGGATCCCTGGGTGGCGCAGCGGTTTGGCGCCTGCCTTTGGCCAGGGCGCGATCCTGGAGACCCGGGATCGAATCCCACATCGGGCTCCCGGTGCATGGAGCCTGCTTCTCCCTCT

CM021968.1:10325141 : ATTTTATTTTATTTTTAAATTTTGTTTTTTTAGGATCCCTGGGTGGCGCAGCGGTTTGGCGCCTGCCTTTGGCCAGGGCGCGATCCTGGAGACCCGGGATCGAATCCCACATCGGGCTCCCGGTGCATGGAGCCTGCTTCTCCCTCT

CM021964.1:30661009 : GTGGTCTCTGAAATATTTATAAAAACCTGCTGTGGGATCCCTGGGTGGCGCAGCGGTTTGGCGCCTGCCTTTGGCCAGGGCGCGATCCTGGAGACCCGGGATCGAATCCCACATCGGGCTCCCGGTGCATGGAGCCTGCTTCTCCCTCT

CM021978.1:18216705 : TTACCTCTTCTTTACGTAAAAAAATTTGTGTTGGGATCCCTGGGTGGCGCAGCGGTTTGGCGCCTGCCTTTGGCCAGGGCGCGATCCTGGAGACCCGGGATCGAATCCCACATCGGGCTCCCGGTGCATGGAGCCTGCTTCTCCCTCT

CM021966.1:47327703 : CTAATAAAGTTTGTATTGAAAGCTAAAAATCGGATCCCTGGGTGGCGCAGCGGTTTGGCGCCTGCCTTTGGCCAGGGCGCGATCCTGGAGACCCGGGATCGAATCCCACATCGGGCTCCCGGTGCATGGAGCCTGCTTCTCCCTCT

CM021970.1:55413363 : GGGTTGGAGCCCTTCTTAAGACCACAGCATTTGGGATCCCTGGGTGGCGCAGCGGTTTGGCGCCTGCCTTTGGCCAGGGCGCGATCCTGGAGACCCGGGATCGAATCCCACATCGGGCTCCCGGTGCATGGAGCCTGCTTCTCCCTCT

CM021966.1:60666245 : CACATTCGTTGCAAAATGTTTAAAAATTTTCTACGGGATCCCTGGGTGGCGCAGCGGTTTGGCGCCTGCCTTTGGCCAGGGCGCGATCCTGGAGACCCGGGATCGAATCCCACATCGGGCTCCCGGTGCATGGAGCCTGCTTCTCCCTCT

CM021998.1:2561342 : AGAATTAACAAGATTTCATGAAACTAATGATAAGGATCCCTGGGTGGCGCAGCGGTTTGGCGCCTGCCTTTGGCCAGGGCGCGATCCTGGAGACCCGGGATCGAATCCCACATCGGGCTCCCGGTGCATGGAGCCTGCTTCTCCCTCT

CM021966.1:57346575 : CTTACATTACATATACAAAATCTAAATAATTTGGGATCCCTGGGTGGCGCAGCGGTTTGGCGCCTGCCTTTGGCCAGGGCGCGATCCTGGAGACCCGGGATCGAATCCCACATCGGGCTCCCGGTGCATGGAGCCTGCTTCTCCCTCT

CM022000.1:5548874 : GGTATGCACAGGATCTCAAAATGCATGTTTCCCGGATCCCTGGGTGGCGCAGCGGTTTGGCGCCTGCCTTTGGCCAGGGCGCGATCCTGGAGACCCGGGATCGAATCCCACATCGGGCTCCCGGTGCATGGAGCCTGCTTCTCCCTCT

CM021987.1:24241989 : ACTGGAACAGGAAGAAATAGAAAACCTTTAACAGGGATCCCTGGGTGGCGCAGCGGTTTGGCGCCTGCCTTTGGCCAGGGCGCGATCCTGGAGACCCGGGATCGAATCCCACATCGGGCTCCCGGTGCATGGAGCCTGCTTCTCCCTCT

CM021989.1:1299907 : TGTCAATAATTTGTTGTTTAAAGTCACCACTCTAGGGATCCCTGGGTGGCGCAGCGGTTTGGCGCCTGCCTTTGGCCAGGGCGCGATCCTGGAGACCCGGGATCGAATCCCACATCGGGCTCCCGGTGCATGGAGCCTGCTTCTCCCTCT

CM021976.1:5736094 : AAGTGTGAGTGACGTTTAAAAATGAAAACGCTGGGATCCCTGGGTGGCGCAGCGGTTTGGCGCCTGCCTTTGGCCAGGGCGCGATCCTGGAGACCCGGGATCGAATCCCACATCGGGCTCCCGGTGCATGGAGCCTGCTTCTCCCTCT

CM021969.1:31664805 : AGATTTTATTTATCTTTTTTAAAGTAATCTCTCGGATCCCTGGGTGGCGCAGCGGTTTGGCGCCTGCCTTTGGCCAGGGCGCGATCCTGGAGACCCGGGATCGAATCCCACATCGGGCTCCCGGTGCATGGAGCCTGCTTCTCCCTCT

CM021984.1:50603247 : GTGATTCATCAGTTGTATATAATACCACTGCTCGGATCCCTGGGTGGCGCAGCGGTTTGGCGCCTGCCTTTGGCCAGGGCGCGATCCTGGAGACCCGGGATCGAATCCCACATCGGGCTCCCGGTGCATGGAGCCTGCTTCTCCCTCT

CM021962.1:57612401 : GTCTAATATGAAATGGATTAAAGACAGAGTCAAGGATCCCTGGGTGGCGCAGCGGTTTGGCGCCTGCCTTTGGCCAGGGCGCGATCCTGGAGACCCGGGATCGAATCCCACATCGGGCTCCCGGTGCATGGAGCCTGCTTCTCCCTCT

CM021976.1:38824663 : AAAAAAAAAAAAAAAAAAAAAAAAAAAAAAGGATCCCTGGGTGGCGCAGCGGTTTGGCGCCTGCCTTTGGCCAGGGCGCGATCCTGGAGACCCGGGATCGAATCCCACATCGGGCTCCCGGTGCATGGAGCCTGCTTCTCCCTCT

CM021983.1:612810 : ACAAGTGAAATCAGATTAAAGAACATGAAGGATGGGATCCCTGGGTGGCGCAGCGGTTTGGCGCCTGCCTTTGGCCAGGGCGCGATCCTGGAGACCCGGGATCGAATCCCACATCGGGCTCCCGGTGCATGGAGCCTGCTTCTCCCTCT

CM021984.1:17474507 : ACATGCTTTGAAACGGGTAAGAAAAAATAATCTCGGATCCCTGGGTGGCGCAGCGGTTTGGCGCCTGCCTTTGGCCAGGGCGCGATCCTGGAGACCCGGGATCGAATCCCACATCGGGCTCCCGGTGCATGGAGCCTGCTTCTCCCTCT

CM021981.1:55525507 : AGAAAAGTAATCTTTTAAAGAACTGAAGATTGGAGGGATCCCTGGGTGGCGCAGCGGTTTGGCGCCTGCCTTTGGCCAGGGCGCGATCCTGGAGACCCGGGATCGAATCCCACATCGGGCTCCCGGTGCATGGAGCCTGCTTCTCCCTCT

CM021972.1:27660724 : CAAAAGATAAAGTCTTTTTTAAAGCCAGAGGTCGGGATCCCTGGGTGGCGCAGCGGTTTGGCGCCTGCCTTTGGCCAGGGCGCGATCCTGGAGACCCGGGATCGAATCCCACATCGGGCTCCCGGTGCATGGAGCCTGCTTCTCCCTCT

CM021968.1:44424747 : CCAAGAAATACATTTATATGAGAAATATATGAGGGATCCCTGGGTGGCGCAGCGGTTTGGCGCCTGCCTTTGGCCAGGGCGCGATCCTGGAGACCCGGGATCGAATCCCACATCGGGCTCCCGGTGCATGGAGCCTGCTTCTCCCTCT

CM021986.1:18354655 : ATGTCCTTTGGTGTTATTTAAAAAGTCAACACCAAGGATCCCTGGGTGGCGCAGCGGTTTGGCGCCTGCCTTTGGCCAGGGCGCGATCCTGGAGACCCGGGATCGAATCCCACATCGGGCTCCCGGTGCATGGAGCCTGCTTCTCCCTCT

CM021980.1:17876643 : GAGCCAGGATGGGAATTAAGAAAAAGAGAGAACGGGATCCCTGGGTGGCGCAGCGGTTTGGCGCCTGCCTTTGGCCAGGGCGCGATCCTGGAGACCCGGGATCGAATCCCACATCGGGCTCCCGGTGCATGGAGCCTGCTTCTCCCTCT

CM021980.1:41754496 : GAAAGACACTAACAGGATGGAAGGAAAAACTAGGATCCCTGGGTGGCGCAGCGGTTTGGCGCCTGCCTTTGGCCAGGGCGCGATCCTGGAGACCCGGGATCGAATCCCACATCGGGCTCCCGGTGCATGGAGCCTGCTTCTCCCTCT

CM021962.1:7987457 : ACATGTGTCGTGCTGCCTTAAAAATACTACTCTCGGATCCCTGGGTGGCGCAGCGGTTTGGCGCCTGCCTTTGGCCAGGGCGCGATCCTGGAGACCCGGGATCGAATCCCACATCGGGCTCCCGGTGCATGGAGCCTGCTTCTCCCTCT

CM021973.1:59099445 : TTGCTTGGACTCTTATTAGTCATATTCACTCTAGGATCCCTGGGTGGCGCAGCGGTTTGGCGCCTGCCTTTGGCCAGGGCGCGATCCTGGAGACCCGGGATCGAATCCCACATCGGGCTCCCGGTGCATGGAGCCTGCTTCTCCCTCT

CM021983.1:4637355 : TTTCAATGTTGCTTGAAAGAAATGTTTGTCTTTGGGATCCCTGGGTGGCGCAGCGGTTTGGCGCCTGCCTTTGGCCAGGGCGCGATCCTGGAGACCCGGGATCGAATCCCACATCGGGCTCCCGGTGCATGGAGCCTGCTTCTCCCTCT

CM021986.1:24336044 : CAATTTTTTTTTTTTTTAAATAACAGCATAAAGGATCCCTGGGTGGCGCAGCGGTTTGGCGCCTGCCTTTGGCCAGGGCGCGATCCTGGAGACCCGGGATCGAATCCCACATCGGGCTCCCGGTGCATGGAGCCTGCTTCTCCCTCT

CM021970.1:15683527 : CTTTCTAGGAACGTGGCATAAAACCTGTGGTGAAGGATCCCTGGGTGGCGCAGCGGTTTGGCGCCTGCCTTTGGCCAGGGCGCGATCCTGGAGACCCGGGATCGAATCCCACATCGGGCTCCCGGTGCATGGAGCCTGCTTCTCCCTCT

CM021979.1:3742243 : CTGAATTAATAATGATTAAATTAGCATCGTTTGGGATCCCTGGGTGGCGCAGCGGTTTGGCGCCTGCCTTTGGCCAGGGCGCGATCCTGGAGACCCGGGATCGAATCCCACATCGGGCTCCCGGTGCATGGAGCCTGCTTCTCCCTCT

CM021997.1:1943637 : AGTCCTTGCTCTGCAATAAATGTTTTTGTCTCGGATCCCTGGGTGGCGCAGCGGTTTGGCGCCTGCCTTTGGCCAGGGCGCGATCCTGGAGACCCGGGATCGAATCCCACATCGGGCTCCCGGTGCATGGAGCCTGCTTCTCCCTCT

CM021972.1:69345756 : AGAGGAAGAAATGGGCTCTAGAGAGGGATGGAGAGGGATCCCTGGGTGGCGCAGCGGTTTGGCGCCTGCCCTTTGGCCACAGGGCGCGATCCTGGAGACCCGGGATCGAATCCCACATCGGGCTCCCGGTGCATGGAGCCTGCTTCTCCCTCT

CM021990.1:29588498 : AATTAGAATATTAAAGTTATGATACAAGTAAAGAGGGATCCCTGGGTGGCGCAGCGGTTTGGCGCCTGCCCTTTGGCCACAGGGCGCGATCCTGGAGACCCGGGATCGAATCCCACATCGGGCTCCCGGTGCATGGAGCCTGCTTCTCCCTCT

CM021963.1:63596026 : TTACAAATTTGTTGTTTTTAAATCTTGACTTTGGAGGGATCCCTGGGTGGCGCAGCGGTTTGGCGCCTGCCCTTTGGCCACAGGGCGCGATCCTGGAGACCCGGGATCGAATCCCACATCGGGCTCCCGGTGCATGGAGCCTGCTTCTCCCTCT

CM021993.1:21711578 : GATCAAGGAATACAACAACTCAAATCTGACGTAGGGATCCCTGGGTGGCGCAGCGGTTTGGCGCCTGCCCTTTGGCCACAGGGCGCGATCCTGGAGACCCGGGATCGAATCCCACATCGGGCTCCCGGTGCATGGAGCCTGCTTCTCCCTCT

CM021995.1:42174335 : TTACATTTTGCTATACAGTCAATTCTCTATTAGTTGGGATCCCTGGGTGGCGCAGCGGTTTGGCGCCTGCCCTTTGGCCACAGGGCGCGATCCTGGAGACCCGGGATCGAATCCCACATCGGGCTCCCGGTGCATGGAGCCTGCTTCTCCCTCT

CM021974.1:21466803 : ACTTCACAGAAATGGAATTAATACCTTACATGTAGGGATCCCTGGGTGGCGCAGCGGTTTGGCGCCTGCCCTTTGGCCACAGGGCGCGATCCTGGAGACCCGGGATCGAATCCCACATCGGGCTCCCGGTGCATGGAGCCTGCTTCTCCCTCT

CM021994.1:591326-5 : GGCGTGGGTGTCTCTGACACAAGAGCGAGGAGGGGGGATCCCTGGGTGGCGCAGCGGTTTGGCGCCTGCCCTTTGGCCACAGGGCGCGATCCTGGAGACCCGGGATCGAATCCCACATCGGGCTCCCGGTGCATGGAGCCTGCTTCTCCCTCT

CM021995.1:39065853 : GTTATTTTAAAGCACTTTCAAAGTAGGATTTGCAAGGGATCCCTGGGTGGCGCAGCGGTTTGGCGCCTGCCCTTTGGCCACAGGGCGCGATCCTGGAGACCCGGGATCGAATCCCACATCGGGCTCCCGGTGCATGGAGCCTGCTTCTCCCTCT

CM022000.1:109360845 : ACTTCAGTAAACCAAAATAGAAACAAAAAATAGGGGATCCCTGGGTGGCGCAGCGGTTTGGCGCCTGCCCTTTGGCCACAGGGCGCGATCCTGGAGACCCGGGATCGAATCCCACATCGGGCTCCCGGTGCATGGAGCCTGCTTCTCCCTCT

CM021973.1:4108621 : ATTTCTACAAGTTCATTTAATTTAGTCTCCTAGGGATCCCTGGGTGGCGCAGCGGTTTGGCGCCTGCCCTTTGGCCACAGGGCGCGATCCTGGAGACCCGGGATCGAATCCCACATCGGGCTCCCGGTGCATGGAGCCTGCTTCTCCCTCT

CM021965.1:8381480 : TATGTGTACAACCTCAGAAAAAAAACAGGATGGGATCCCTGGGTGGCGCAGCGGTTTGGCGCCTGCCCTTTGGCCACAGGGCGCGATCCTGGAGACCCGGGATCGAATCCCACATCGGGCTCCCGGTGCATGGAGCCTGCTTCTCCCTCT

CM021970.1:58032967 : TCTCTCATGATAGATAAATAAAAAAAATCTAGGGATCCCTGGGTGGCGCAGCGGTTTGGCGCCTGCCCTTTGGCCACAGGGCGCGATCCTGGAGACCCGGGATCGAATCCCACATCGGGCTCCCGGTGCATGGAGCCTGCTTCTCCCTCT

CM021983.1:34861962 : ATTGAATTGCTATTTTAAAAATTTGTGAGATATCTGGGATCCCTGGGTGGCGCAGCGGTTTGGCGCCTGCCCTTTGGCCACAGGGCGCGATCCTGGAGACCCGGGATCGAATCCCACATCGGGCTCCCGGTGCATGGAGCCTGCTTCTCCCTCT

CM021976.1:4742253 : GTGGGAGGGAAGGTGGTGTAGAAAAGGATAGGGGGGATCCCTGGGTGGCGCAGCGGTTTGGCGCCTGCCCTTTGGCCACAGGGCGCGATCCTGGAGACCCGGGATCGAATCCCACATCGGGCTCCCGGTGCATGGAGCCTGCTTCTCCCTCT

CM021970.1:11005307 : CCGTTAAGGGTCAGTGTATTAAAAATACAATAGAGGGATCCCTGGGTGGCGCAGCGGTTTGGCGCCTGCCCTTTGGCCACAGGGCGCGATCCTGGAGACCCGGGATCGAATCCCACATCGGGCTCCCGGTGCATGGAGCCTGCTTCTCCCTCT

CM021978.1:60928205 : GGTGTTCAACTTTTGTGTTTAAAAATCAGCTTTTCAAGGGATCCCTGGGTGGCGCAGCGGTTTGGCGCCTGCCCTTTGGCCACAGGGCGCGATCCTGGAGACCCGGGATCGAATCCCACATCGGGCTCCCGGTGCATGGAGCCTGCTTCTCCCTCT

CM021981.1:57075690 : aTTAAAAAATAAAAAAAAAAAAAACAACATTAAGGGATCCCTGGGTGGCGCAGCGGTTTGGCGCCTGCCCTTTGGCCACAGGGCGCGATCCTGGAGACCCGGGATCGAATCCCACATCGGGCTCCCGGTGCATGGAGCCTGCTTCTCCCTCT

CM021995.1:13939375 : ATAAAAATCTTTTTTTTAAAAAATATTATTAATAACAGGGATCCCTGGGTGGCGCAGCGGTTTGGCGCCTGCCCTTTGGCCACAGGGCGCGATCCTGGAGACCCGGGATCGAATCCCACATCGGGCTCCCGGTGCATGGAGCCTGCTTCTCCCTCT

CM021972.1:66556493 : ATAGTGTCTGGTTCAAGTGTCAACACTAGACGAGGGATCCCTGGGTGGCGCAGCGGTTTGGCGCCTGCCCTTTGGCCACAGGGCGCGATCCTGGAGACCCGGGATCGAATCCCACATCGGGCTCCCGGTGCATGGAGCCTGCTTCTCCCTCT

CM022000.1:72838784 : TATGTCTCATGTGCATTAGAAAAATAAATTAGAGGGGATCCCTGGGTGGCGCAGCGGTTTGGCGCCTGCCCTTTGGCCACAGGGCGCGATCCTGGAGACCCGGGATCGAATCCCACATCGGGCTCCCGGTGCATGGAGCCTGCTTCTCCCTCT

CM021962.1:48108469 : AGAGAATGGAATGAGTTTTAAAGTGCTACCAGAGGGATCCCTGGGTGGCGCAGCGGTTTGGCGCCTGCCCTTTGGCCACAGGGCGCGATCCTGGAGACCCGGGATCGAATCCCACATCGGGCTCCCGGTGCATGGAGCCTGCTTCTCCCTCT

CM021984.1:51824327 : TAGTGAGATGAAGCTTTTAGAATACAAGAGTGGGGGATCCCTGGGTGGCGCAGCGGTTTGGCGCCTGCCCTTTGGCCACAGGGCGCGATCCTGGAGACCCGGGATCGAATCCCACATCGGGCTCCCGGTGCATGGAGCCTGCTTCTCCCTCT

CM021980.1:61235 : aTCTTTGTTTTTTTTCATATAATAAATAGATTTATGGGATCCCTGGGTGGCGCAGCGGTTTGGCGCCTGCCCTTTGGCCACAGGGCGCGATCCTGGAGACCCGGGATCGAATCCCACATCGGGCTCCCGGTGCATGGAGCCTGCTTCTCCCTCT

CM021963.1:13049385 : TGGGGTTTTCTCGGAATACAAGAGGGTTAAGCAGGGATCCCTGGGTGGCGCAGCGGTTTGGCGCCTGCCCTTTGGCCACAGGGCGCGATCCTGGAGACCCGGGATCGAATCCCACATCGGGCTCCCGGTGCATGGAGCCTGCTTCTCCCTCT

CM021978.1:45530231 : ACTTTTCATTTGATTCATAAAAAATCATATTGAGGGATCCCTGGGTGGCGCAGCGGTTTGGCGCCTGCCCTTTGGCCACAGGGCGCGATCCTGGAGACCCGGGATCGAATCCCACATCGGGCTCCCGGTGCATGGAGCCTGCTTCTCCCTCT

CM021996.1:27576739 : TACACCAAAAAATCTATAAAAATTAAGAGTGGGGATCCCTGGGTGGCGCAGCGGTTTGGCGCCTGCCCTTTGGCCACAGGGCGCGATCCTGGAGACCCGGGATCGAATCCCACATCGGGCTCCCGGTGCATGGAGCCTGCTTCTCCCTCT

CM021967.1:35891821 : CAGTATTACTTTTCTAATTTTGAAGAATAATAAGGGATCCCTGGGTGGCGCAGCGGTTTGGCGCCTGCCCTTTGGCCACAGGGCGCGATCCTGGAGACCCGGGATCGAATCCCACATCGGGCTCCCGGTGCATGGAGCCTGCTTCTCCCTCT

CM021967.1:60250403 : TAATGATCTATGCTGGTTAGAGTAACAGCAGTATAGGGATCCCTGGGTGGCGCAGCGGTTTGGCGCCTGCCCTTTGGCCACAGGGCGCGATCCTGGAGACCCGGGATCGAATCCCACATCGGGCTCCCGGTGCATGGAGCCTGCTTCTCCCTCT

CM022000.1:102497459 : CATTCAGAGCAAGCTTTGTGAAGAAAGGATATAGGGGATCCCTGGGTGGCGCAGCGGTTTGGCGCCTGCCCTTTGGCCACAGGGCGCGATCCTGGAGACCCGGGATCGAATCCCACATCGGGCTCCCGGTGCATGGAGCCTGCTTCTCCCTCT

CM021989.1:11219206 : AGATGTAGCTCTAAGCAAGAAGACTCACCATTAGGGATCCCTGGGTGGCGCAGCGGTTTGGCGCCTGCCCTTTGGCCACAGGGCGCGATCCTGGAGACCCGGGATCGAATCCCACATCGGGCTCCCGGTGCATGGAGCCTGCTTCTCCCTCT

CM021989.1:9844788 : CAAATCATAAATTTAATAAGAAATATCTTCTGTTGGGATCCCTGGGTGGCGCAGCGGTTTGGCGCCTGCCCTTTGGCCACAGGGCGCGATCCTGGAGACCCGGGATCGAATCCCACATCGGGCTCCCGGTGCATGGAGCCTGCTTCTCCCTCT

[illegible]

[illegible]

Can\_in\_RAB3GAP : ATCCAGCAGACCTGATAAATGAGTGTACTG-----TGGGTGGCGCAGCGGTTTGGTGCCTGCCTTTGGCCACAGGGCGCGATCCTGGAGACCCGGGATCGAATCCACAGTCAAGGCTCCCGGTGCATGGAGCCTGCTTC

chr11\_50563233 : TTTTATTTATTTATTTATTTATAGAGACGATGGGATCCCTGGGTGGCGCAGCGGTTTGGTGCCTGCCTTTGGCCACAGGGCGCGATCCTGGAGACCCGGGATCGAATCCACAGTCAAGGCTCCCGGTGCATGGAGCCTGCTTC

chr20\_45149567 : CTTCCAGCAATTTATCAAAATCTGGAGTGGAGGGATCCCTGGGTGGCGCAGCGGTTTGGTGCCTGCCTTTGGCCACAGGGCGCGATCCTGGAGACCCGGGATCGAATCCACAGTCAAGGCTCCCGGTGCATGGAGCCTGCTTC

chr23\_10559329 : AGAAATGCCAGTTTAAAAATCTGGGGGGTGGGATCCCTGGGTGGCGCAGCGGTTTGGTGCCTGCCTTTGGCCACAGGGCGCGATCCTGGAGACCCGGGATCGAATCCACAGTCAAGGCTCCCGGTGCATGGAGCCTGCTTC

chr14\_6885890 : CATGACTTTGTGAATATACTAAAAATCACTGGGATCCCTGGGTGGCGCAGCGGTTTGGTGCCTGCCTTTGGCCACAGGGCGCGATCCTGGAGACCCGGGATCGAATCCACAGTCAAGGCTCCCGGTGCATGGAGCCTGCTTC

chr14\_6723646 : TAAATAAAAATATTTTTTAAATAAAAAATAAGGATCCCTGGGTGGCGCAGCGGTTTGGTGCCTGCCTTTGGCCACAGGGCGCGATCCTGGAGACCCGGGATCGAATCCACAGTCAAGGCTCCCGGTGCATGGAGCCTGCTTC

chr23\_11296985 : GAGAAATATTACATAAATAAAGAGACAGGATCCCTGGGTGGCGCAGCGGTTTGGTGCCTGCCTTTGGCCACAGGGCGCGATCCTGGAGACCCGGGATCGAATCCACAGTCAAGGCTCCCGGTGCATGGAGCCTGCTTC

chr37\_25790079 : AATAAAATCTTTTTTAAAAATGCCCATGTAAGGATCCCTGGGTGGCGCAGCGGTTTGGTGCCTGCCTTTGGCCACAGGGCGCGATCCTGGAGACCCGGGATCGAATCCACAGTCAAGGCTCCCGGTGCATGGAGCCTGCTTC

chr25\_39686772 : GATGAGCTGTTATCCAAATACACTTGGTGGGATCCCTGGGTGGCGCAGCGGTTTGGTGCCTGCCTTTGGCCACAGGGCGCGATCCTGGAGACCCGGGATCGAATCCACAGTCAAGGCTCCCGGTGCATGGAGCCTGCTTC

chr2\_72065051 : AGCCATTGGAGAAATTTAAACATGGAACTTGGGATCCCTGGGTGGCGCAGCGGTTTGGTGCCTGCCTTTGGCCACAGGGCGCGATCCTGGAGACCCGGGATCGAATCCACAGTCAAGGCTCCCGGTGCATGGAGCCTGCTTC

chr9\_41032131 : AGGAAGTGCAAATTTAAAAATGAATACGGGGATCCCTGGGTGGCGCAGCGGTTTGGTGCCTGCCTTTGGCCACAGGGCGCGATCCTGGAGACCCGGGATCGAATCCACAGTCAAGGCTCCCGGTGCATGGAGCCTGCTTC

chr16\_10058126 : AAAAATCTCTTTATTA AAAAATCTGAAAAATGGGATCCCTGGGTGGCGCAGCGGTTTGGTGCCTGCCTTTGGCCACAGGGCGCGATCCTGGAGACCCGGGATCGAATCCACAGTCAAGGCTCCCGGTGCATGGAGCCTGCTTC

chr18\_13883695 : CAAACAGAAACAGAATTGAAACATGACCAAGGATCCCTGGGTGGCGCAGCGGTTTGGTGCCTGCCTTTGGCCACAGGGCGCGATCCTGGAGACCCGGGATCGAATCCACAGTCAAGGCTCCCGGTGCATGGAGCCTGCTTC

chr21\_4425642 : TAAAAATCCATCCTTAGGATTACCCATTTGTGGGATCCCTGGGTGGCGCAGCGGTTTGGTGCCTGCCTTTGGCCACAGGGCGCGATCCTGGAGACCCGGGATCGAATCCACAGTCAAGGCTCCCGGTGCATGGAGCCTGCTTC

chr24\_14483734 : ATTAGTTTAAAGCAAAAAAGGGTTTCTTTCCGGGATCCCTGGGTGGCGCAGCGGTTTGGTGCCTGCCTTTGGCCACAGGGCGCGATCCTGGAGACCCGGGATCGAATCCACAGTCAAGGCTCCCGGTGCATGGAGCCTGCTTC

chr33\_2401332 : TGC AAAACTTTCTTTAAACAACATCAAGAGGATCCCTGGGTGGCGCAGCGGTTTGGTGCCTGCCTTTGGCCACAGGGCGCGATCCTGGAGACCCGGGATCGAATCCACAGTCAAGGCTCCCGGTGCATGGAGCCTGCTTC

|                  |                                                                   |       |          |        |        |                               |                            |                                              |                               |
|------------------|-------------------------------------------------------------------|-------|----------|--------|--------|-------------------------------|----------------------------|----------------------------------------------|-------------------------------|
| Can_in_RAB3GAP : | TCCCTCTGCCTGTGTCTCTGCCTCTCTCTCTCTCTGTAACATCATATAAATAAAATAAAATTA   | AAAAA | -----    | TAAAAA | TATT   | AAAAAAAAAAAAAAAAAAAAAAAAAAAAA | AAATGAGTGTACTGATTGG        |                                              |                               |
| chr11_50563233 : | TCCCTCTGCCTGTGTCTCTGCCTCTCTCTCTCTCTGTAACATCATATAAATAAAATAAAATTA   | AAAAA | TAA      | -----  | TAAAAA | A                             | TATT                       | TATAGAAAGCATGTGAATGGTGGGAGGGGCAAGAGATAGAGGA  |                               |
| chr20_45149567 : | TCCCTCTGCCTGTGTCTCTGCCTCTCTCTCTCTCTCTGTAACATCATATAAATAAAATAAAATTA | AAAAA | A        | -----  | TAAAAA | TATT                          | AAAAAAAAAAAAAAAAAAAAA      | AAACCTGGAGTGGAGTGTGGAAACCC                   |                               |
| chr23_10559329 : | TCCCTCTGCCTGTGTCTCTGCCTCTCTCTCTCTCTCTGTAACATCATATAAATAAAATAAAATTA | AAAAA | -----    | TAAAAA | TATT   | AAAAAAAAAAAAA                 | TAA                        | TAAATCTGGGGGAGGGTTT                          |                               |
| chr14_6885890 :  | TCCCTCTGCCTGTGTCTCTGCCTCTCTCTCTCTCTGTAACATCATATAAATAAAATAAAATTA   | AAAAA | -----    | TAAAAA | TATTTT | AAAAAAAAA                     | TAA                        | AAATCACTGAATGGTTTGCTTTAAAGGA                 |                               |
| chr14_6723646 :  | TCCCTCTGCCTGTGTCTCTGCCTCTCTCTCTCTCTGTAACATCATATAAATAAAATAAAATTA   | AAAAA | AATAAAAA | -----  | TAAAAA | T                             | TAA                        | TAAATAAAATAAATAAAGCCAGAGAGGGGAGGTGGAG        |                               |
| chr23_11296985 : | TCCCTCTGCCTGTGTCTCTGCCTCTCTCTCTCTCTCTGTAACATCATATAAATAAAATAAAATTA | AAAAA | AA       | -----  | TAAAAA | T                             | TAA                        | TAAATAAAATAAATAAAGGACATCCCAATGAAATA          |                               |
| chr37_2590079 :  | TCCCTCTGCCTGTGTCTCTGCCTCTCTCTCTCTCTCTGTAACATCATATAAATAAAATAAAATTA | AAAAA | -----    | AAAA   | TATT   | AAAAA                         | TGCCCATGTAAACTGTATTACTT    | CTGATATGAAATTTG                              |                               |
| chr25_39686772 : | TCCCTCTGCCTGTGTCTCTGCCTCTCTCTCTCTCTGTAACATCATATAAATAAAATAAAATTA   | AAAAA | A        | -----  | TAAAAA | TATTTT                        | AAAAAAAAAAAAAAAAA          | CAAAAAAAAA                                   | CAAAATACACTTGGTGGGT           |
| chr2_72065051 :  | TCCCTCTGCCTGTGTCTCTGCCTCTCTCTCTCTCTGTAACATCATATAAATAAAATAAAATTA   | AAAAA | -----    | TAAAAA | T      | TAA                           | TAA                        | TAAATAAATAAATAAAGCATGGAATTA                  |                               |
| chr9_41032131 :  | TCCCTCTGCCTGTGTCTCTGCCTCTCTCTCTCTCTGTAACATCATATAAATAAAATAAAATTA   | AAAAA | A        | -----  | TAAAAA | TATT                          | AAAAAAAAAAAAA              | TAA                                          | TAAATATGAATAGCGGGATCCCTGGCGGC |
| chr16_10058126 : | TCCCTCTGCCTGTGTCTCTGCCTCTCTCTCTCTCTGTAACATCATATAAATAAAATAAAATTA   | AAAAA | -----    | TAAAAA | TATT   | AAAAAAAAAAAAAAAAAAAAA         | AAAAA                      | AAACCTGAAACACATACATCT                        |                               |
| chr18_13883695 : | TCCCTCTGCCTGTGTCTCTGCCTCTCTCTCTCTCTGTAACATCATATAAATAAAATAAAATTA   | AAAAA | -----    | TAAAAA | TATTTT | AAAAAAAAAAAAAAAAAAAAAAAAAAAAA | AAAAA                      | GAAACATGACCA                                 |                               |
| chr21_4425642 :  | TCCCTCTGCCTGTGTCTCTGCCTCTCTCTCTCTCTGTAACATCATATAAATAAAATAAAATTA   | AAAAA | AAAA     | -----  | TAAAAA | T                             | TAA                        | TAAATAAATAAATAAAGGATACCCATTTGTCTATT          |                               |
| chr24_14483734 : | TCCCTCTGCCTGTGTCTCTGCCTCTCTCTCTCTCTGTAACATCATATAAATAAAATAAAATTA   | AAAAA | A        | -----  | TAAAAA | T                             | TAA                        | TAAATAAATAAATAAAGGGTTCTTTCTTTTCTGTAATGTAATTA |                               |
| chr33_2401332 :  | TCCCTCTGCCTGTGTCTCTGCCTCTCTCTCTCTCTGTAACATCATATAAATAAAATAAAATTA   | AAAAA | -----    | TAAAAA | TATT   | AAAAAAAAAAAAAAAAAAAAA         | CAACACATCAAGAGGAGAAATAGACA |                                              |                               |

```

Can in SILV : -----TTTCTCCTTTATTCTCCCAATGTTAGGGGAAGACCTCTGGGATCCCTGGGTGGCGCAGCGGTTTGGCGCCTGCCTT
chr1:113871832-113872406 : CCCAGAGGGGATGCCTTTGCTCTTTTCTTGCTTTGATTCTACACCCCAAGTACTTTTCAAATGATAGCAACTGGGATCCCTGGGTGGCGCAGCGGTTTGGCGCCTGCCTT
chr2:30949619-30950193 : AATATCATAAATATTGAAGACATAAGACGATTGTTGTAATGGTTTCTCTCAGATTAGGAACATAGGAAAGAGGGATCCCTGGGTGGCGCAGCGGTTTGGCGCCTGCCTT
chrX:24155933-24156527 : CCACCTGTTTAACACTCTAATAAATCATTTTCAGTTGTTCTCAAACACGTTTTCCTTTAAACAAAGAGAGAGAGGATCCCTGGGTGGCGCAGCGGTTTGGCGCCTGCCTT
chr6:64255883-64256457 : AGCATTGGCCTACATAATTAACAATTATTTCTTGGGCATAAATAAAATAAAATTTAAAAAAGGATCCCTGGGTGGCGCAGCGGTTTGGCGCCTGCCTT
chr6:20337906-20338480 : AAGTGAATCAGACAGAGAGAAGACAAATATCATATGATTACACTATATAGTGGAATCTAAAAACAACAAACAGGATCCCTGGGTGGCGCAGCGGTTTGGCGCCTGCCTT
chrX:56731204-56731778 : TTATAAGATGAAGGAACAAATTCCTTGTTGATTTTCCAGAGGTGTTCTGGGATTCATTAAGATAAGGTGATGGAAGGATCCCTGGGTGGCGCAGCGGTTTGGCGCCTGCCTT
chr10:51773037-51773611 : CAGGACGCCAGCAGAGGACCCAGAAAGTAGAATAAAAGTCTCTGTCAAACAATATTGAAAAGGTTTCCAGGATCCCTGGGTGGCGCAGCGGTTTGGCGCCTGCCTT

```

chr8:35944961-35945534 : TTGCCAACATGCTGGCACAGCACATCTTTCAAGTTGCTGGCATATCTCTGATTTAAATACAAAGAAATACGGGGATCCCTGGGTGGCGCAGCGGTTTGGCGCCTGCCTT

chr18:17868194-17868767 : GAACAAAAGCAAATTAGTGGTGTAAGAGAGGATTATAGGAAAGTGACCAACCTGTTTAAAGAGAGCAACCTACTGGGATCCCTGGGTGGCGCAGCGGTTTGGCGCCTGCCTT

chr7:47465084-47465658 : TGTGTCTCATGGATAAAATAAAATCTTTAAAAAAGAAAGAAACACATTTAAAGTACATAGCCAGGGGATCCCTGGGTGGCGCAGCGGTTTGGCGCCTGCCTT

chr18:4946916-4947489 : GGGAATATGTAAACGTAAATATGAATTAGTTTCATTGGTAGTCTGAGTTCCCTTGCTAGAAAGTTAAGTTGTTGGGATCCCTGGGTGGCGCAGCGGTTTGGCGCCTGCCTT

chr36:18738626-18739199 : GATAATGTACTGTTGAA-TTTATAAAGGCTAAATTTGTGGATGGTTTGACCTTCTTATAAAAGTTCATGGTCTGGGATCCCTGGGTGGCGCAGCGGTTTGGCGCCTGCCTT

chr32:14385689-14386262 : CTAGGACACAAAACCTGAACCTAGACACAATTCCTGTATACCAGGGAATCTCAAATTTTGGTAAAGAGACAGATAGGGATCCCTGGGTGGCGCAGCGGTTTGGCGCCTGCCTT

chr7:32693685-32694258 : GCAACAGGCAGCTTGGTCTTAGCATGTTCTTCAAGTTCTCAAATCCGTAAGTCTTAAAGACTAAATATATAGGGATCCCTGGGTGGCGCAGCGGTTTGGCGCCTGCCTT

chr32:10213640-10214214 : TGTAACCATTTGGATGCATATTTCTTCTTAAGCAGATTAACTTCTGAGAATCTTTAAATCATTTCCATATAGGGATCCCTGGGTGGCGCAGCGGTTTGGCGCCTGCCTT

chr27:3057190-3057763 : GCCCCCTCCCCCTGCTCATGCCGTCTCTCTTTCTCTCTCTCAAATAAAATTTTTTAAAAATCTTTAAAAAATTTGGGATCCCTGGGTGGCGCAGCGGTTTGGCGCCTGCCTT

chr12:35677164-35677737 : TGAGCCACCGGGGCTGCCCGAATCTCTTTCTTTGATGCCTCTAGCTAGCCTATTAAAAAATTTGTACAGAATGGGGATCCCTGGGTGGCGCAGCGGTTTGGCGCCTGCCTT

chr4:27401883-27402456 : TAGATATGAATCTTACCTTCACGGGGCTTTGAATCTGTGAGAGAGTCAGACGTTATACAAACACACACCACAGGGATCCCTGGGTGGCGCAGCGGTTTGGCGCCTGCCTT

chrX:103869600-103870173 : CAAAAATGGGTGTTATTAATGTCCCCCTTTGAATGGTGATGGTGAGGATTAAATGAGATGATAAAACATAAACTGGGGATCCCTGGGTGGCGCAGCGGTTTGGCGCCTGCCTT

chr22:34375382-34375955 : AAAGCCAACATTGGAGATACCGTATTTATGTTTTGGGGTTTCATGGGTACTAACCACATGTCATGGATTCCAAAGGGATCCCTGGGTGGCGCAGCGGTTTGGCGCCTGCCTT

chr23:26368704-26369278 : TACCAGAGGACCTTGGGAAAGTGGCTTAGCCCTCAGGGTGTCAGTCTCACACCTATATAAACCAACACCATCAGGGATCCCTGGGTGGCGCAGCGGTTTGGCGCCTGCCTT

chr15:39588710-39589283 : TTCTTGCACTACCTATTATATATTCTTCAAGGTCAAAAAGTGAAGTCTAGTTATTTTTTAAATGTTGATATGAGGGATCCCTGGGTGGCGCAGCGGTTTGGCGCCTGCCTT

chr7:62448662-62449235 : TAAATCTGGATGAAGGGGATATGGGAGTTTATCTTGAACCTCTTCTGAAGTCTTTGAAATGTTTCCAAATAGGGATCCCTGGGTGGCGCAGCGGTTTGGCGCCTGCCTT

chr5:83185969-83186542 : TAAATGGTGAAAGTCTTAACATATTCTCCCCCTAAAAAAGTGTGTGCTTTATGTATATTTGAAATCCTCAGGGATCCCTGGGTGGCGCAGCGGTTTGGCGCCTGCCTT

chr28:31772028-31772602 : TTGAAAGCCAGCTCAGTGAGACACATCTCTCTCTTAGAAGCTACTAATATTTGTTTTTAAATGAGCAGCTCAGGGATCCCTGGGTGGCGCAGCGGTTTGGCGCCTGCCTT

chr2:8763851-8764425 : CCCACTATTGTCTAGGAGCTGAGCTCAAAATTTCTCTTTCTGTTGAATAGTCTTGAATAAATTTTTTCCATTTAGGGATCCCTGGGTGGCGCAGCGGTTTGGCGCCTGCCTT

chr31:24350903-24351477 : AAAAAAATAAATAATGTTCTTCTCAAGTGAAGAGTTAGTAAGCTTTGAAATGTTTCCAAATAGGGATCCCTGGGTGGCGCAGCGGTTTGGCGCCTGCCTT

chr9:38181488-38182061 : TCCTGAAATATGAAATATTTGGTCATAATACCACCTCTTTTTTTTTTTTTTAAAGATTTATTTATTTAGGGATCCCTGGGTGGCGCAGCGGTTTGGCGCCTGCCTT

chr19:22328635-22329209 : GCCTCAGTGTAGTGACCTATGTTCCGGAAGGTTAATATGTGCCAGCAATGAGCGTCTGTAAGGCACAGCTTGGGATCCCTGGGTGGCGCAGCGGTTTGGCGCCTGCCTT

chr7:12912291-12912864 : GGGGTGGAGGGCATAGGCAGTGAAATCTAGGACAGAGAAATTACCCTAGGTTCTTAAATCAGCAAGAGACCCTGGGGATCCCTGGGTGGCGCAGCGGTTTGGCGCCTGCCTT

# Can in SILV

chr1:113871832-113872406 : TGGCCCAGGGCGCGATCCTGGAGACCCGGGATCGAATCCCACGTCGGGCTCCCGGTGCATGGAGCCTGCTTCTCCCTCTGCCTGTGTCTCTGCGCCTCTCTCTCTCTCTC

chr22:30949619-30950193 : TGGCCCAGGGCGCGATCCTGGAGACCCGGGATCGAATCCCACGTCGGGCTCCCGGTGCATGGAGCCTGCTTCTCCCTCTGCCTGTGTCTCTGCGCCTCTCTCTCTCTCTC

chrX:24155953-24156527 : TGGCCCAGGGCGCGATCCTGGAGACCCGGGATCGAATCCCACGTCGGGCTCCCGGTGCATGGAGCCTGCTTCTCCCTCTGCCTGTGTCTCTGCGCCTCTCTCTCTCTCTC

chr6:64255883-64256457 : TGGCCCAGGGCGCGATCCTGGAGACCCGGGATCGAATCCCACGTCGGGCTCCCGGTGCATGGAGCCTGCTTCTCCCTCTGCCTGTGTCTCTGCGCCTCTCTCTCTCTCTC

chr6:20337906-20338480 : TGGCCCAGGGCGCGATCCTGGAGACCCGGGATCGAATCCCACGTCGGGCTCCCGGTGCATGGAGCCTGCTTCTCCCTCTGCCTGTGTCTCTGCGCCTCTCTCTCTCTCTC

chrX:56731204-56731778 : TGGCCCAGGGCGCGATCCTGGAGACCCGGGATCGAATCCCACGTCGGGCTCCCGGTGCATGGAGCCTGCTTCTCCCTCTGCCTGTGTCTCTGCGCCTCTCTCTCTCTCTC

chr10:51773037-51773611 : TGGCCCAGGGCGCGATCCTGGAGACCCGGGATCGAATCCCACGTCGGGCTCCCGGTGCATGGAGCCTGCTTCTCCCTCTGCCTGTGTCTCTGCGCCTCTCTCTCTCTCTC

chr8:35944961-35945534 : TGGCCCAGGGCGCGATCCTGGAGACCCGGGATCGAATCCCACGTCGGGCTCCCGGTGCATGGAGCCTGCTTCTCCCTCTGCCTGTGTCTCTGCGCCTCTCTCTCTCTCTC

chr18:17868194-17868767 : TGGCCCAGGGCGCGATCCTGGAGACCCGGGATCGAATCCCACGTCGGGCTCCCGGTGCATGGAGCCTGCTTCTCCCTCTGCCTGTGTCTCTGCGCCTCTCTCTCTCTCTC

chr7:47465084-47465658 : TGGCCCAGGGCGCGATCCTGGAGACCCGGGATCGAATCCCACGTCGGGCTCCCGGTGCATGGAGCCTGCTTCTCCCTCTGCCTGTGTCTCTGCGCCTCTCTCTCTCTCTC

chr18:4946916-4947489 : TGGCCCAGGGCGCGATCCTGGAGACCCGGGATCGAATCCCACGTCGGGCTCCCGGTGCATGGAGCCTGCTTCTCCCTCTGCCTGTGTCTCTGCGCCTCTCTCTCTCTCTC

chr36:18738626-18739199 : TGGCCCAGGGCGCGATCCTGGAGACCCGGGATCGAATCCCACGTCGGGCTCCCGGTGCATGGAGCCTGCTTCTCCCTCTGCCTGTGTCTCTGCGCCTCTCTCTCTCTCTC

chr32:14385689-14386262 : TGGCCCAGGGCGCGATCCTGGAGACCCGGGATCGAATCCCACGTCGGGCTCCCGGTGCATGGAGCCTGCTTCTCCCTCTGCCTGTGTCTCTGCGCCTCTCTCTCTCTCTC

chr7:32693685-32694258 : TGGCCCAGGGCGCGATCCTGGAGACCCGGGATCGAATCCCACGTCGGGCTCCCGGTGCATGGAGCCTGCTTCTCCCTCTGCCTGTGTCTCTGCGCCTCTCTCTCTCTCTC

chr32:10213640-10214214 : TGGCCCAGGGCGCGATCCTGGAGACCCGGGATCGAATCCCACGTCGGGCTCCCGGTGCATGGAGCCTGCTTCTCCCTCTGCCTGTGTCTCTGCGCCTCTCTCTCTCTCTC

chr27:3057190-3057763 : TGGCCCAGGGCGCGATCCTGGAGACCCGGGATCGAATCCCACGTCGGGCTCCCGGTGCATGGAGCCTGCTTCTCCCTCTGCCTGTGTCTCTGCGCCTCTCTCTCTCTCTC

chr12:35677164-35677737 : TGGCCCAGGGCGCGATCCTGGAGACCCGGGATCGAATCCCACGTCGGGCTCCCGGTGCATGGAGCCTGCTTCTCCCTCTGCCTGTGTCTCTGCGCCTCTCTCTCTCTCTC

chr4:27401883-27402456 : TGGCCCAGGGCGCGATCCTGGAGACCCGGGATCGAATCCCACGTCGGGCTCCCGGTGCATGGAGCCTGCTTCTCCCTCTGCCTGTGTCTCTGCGCCTCTCTCTCTCTCTC

chrX:103869600-103870173 : TGGCCCAGGGCGCGATCCTGGAGACCCGGGATCGAATCCCACGTCGGGCTCCCGGTGCATGGAGCCTGCTTCTCCCTCTGCCTGTGTCTCTGCGCCTCTCTCTCTCTCTC

chr22:34375382-34375955 : TGGCCCAGGGCGCGATCCTGGAGACCCGGGATCGAATCCCACGTCGGGCTCCCGGTGCATGGAGCCTGCTTCTCCCTCTGCCTGTGTCTCTGCGCCTCTCTCTCTCTCTC

chr23:26368704-26369278 : TGGCCCAGGGCGCGATCCTGGAGACCCGGGATCGAATCCCACGTCGGGCTCCCGGTGCATGGAGCCTGCTTCTCCCTCTGCCTGTGTCTCTGCGCCTCTCTCTCTCTCTC

chr15:39588710-39589283 : TGGCCCAGGGCGCGATCCTGGAGACCCGGGATCGAATCCCACGTCGGGCTCCCGGTGCATGGAGCCTGCTTCTCCCTCTGCCTGTGTCTCTGCGCCTCTCTCTCTCTCTC

chr7:62448662-62449235 : TGGCCCAGGGCGCGATCCTGGAGACCCGGGATCGAATCCCACGTCGGGCTCCCGGTGCATGGAGCCTGCTTCTCCCTCTGCCTGTGTCTCTGCGCCTCTCTCTCTCTCTC

chr5:83185969-83186542 : TGGCCCAGGGCGCGATCCTGGAGACCCGGGATCGAATCCCACGTCGGGCTCCCGGTGCATGGAGCCTGCTTCTCCCTCTGCCTGTGTCTCTGCGCCTCTCTCTCTCTCTC

chr28:31772028-31772602 : TGGCCCAGGGCGCGATCCTGGAGACCCGGGATCGAATCCCACGTCGGGCTCCCGGTGCATGGAGCCTGCTTCTCCCTCTGCCTGTGTCTCTGCGCCTCTCTCTCTCTCTC

chr2:8763851-8764425 : TGGCCCAGGGCGCGATCCTGGAGACCCGGGATCGAATCCCACGTCGGGCTCCCGGTGCATGGAGCCTGCTTCTCCCTCTGCCTGTGTCTCTGCGCCTCTCTCTCTCTCTC

chr31:24350903-24351477 : TGGCCCAGGGCGCGATCCTGGAGACCCGGGATCGAATCCCACGTCGGGCTCCCGGTGCATGGAGCCTGCTTCTCCCTCTGCCTGTGTCTCTGCGCCTCTCTCTCTCTCTC

chr9:38181488-38182061 : TGGCCCAGGGCGCGATCCTGGAGACCCGGGATCGAATCCCACGTCGGGCTCCCGGTGCATGGAGCCTGCTTCTCCCTCTGCCTGTGTCTCTGCGCCTCTCTCTCTCTCTC

chr19:22328635-22329209 : TGGCCCAGGGCGCGATCCTGGAGACCCGGGATCGAATCCCACGTCGGGCTCCCGGTGCATGGAGCCTGCTTCTCCCTCTGCCTGTGTCTCTGCGCCTCTCTCTCTCTCTC

chr7:12912291-12912864 : TGGCCCAGGGCGCGATCCTGGAGACCCGGGATCGAATCCCACGTCGGGCTCCCGGTGCATGGAGCCTGCTTCTCCCTCTGCCTGTGTCTCTGCGCCTCTCTCTCTCTCTC
