# Supplementary material for: Tail Wags Dog’s SINE: Retropositional Mechanisms of Can SINE Depend on Its A-Tail Structure
Source: MDPI journal article supplement (doi:10.3390/biology11101403), 2022-09-26
Supplement: s1 [file s1]

A

sdb\_chr4\_86942253 : TCAATGCAACATTTGCCAGAATGGGGTCAACCAGAAATATTAGAGGGATCCCTGGGTGGCGCAGCGGTTTGGCGCCTGCCTTTGGCCCGGGCGCGATCCTGGAGGCCTGGGATCGAGTCCCACGTCGG  
s\_chrX\_93595261 : TGTTAGTTTCCCTGAGGACGAGCATTGTTAAGAACTGAGTTCTCGGGATCCCTGGGTGGCGCAGCGGTTTGGCGCCTGCCTTTGGCCCGGGCGCGATCCTGGAGGCCTGGGATCGAGTCCCACGTCGG

sdb\_chr4\_86942253 : GCTCCCTGCATGGAGCCTGCTTCTCCCTCTGCCTGTGTCTCTGCCTCTCTGTCTCTCTGTGTAACATCATGAATAAAATAAAATAAAATCTTTAAAAATATATATATAAAAAAAAAAAGAGAAATATTA  
s\_chrX\_93595261 : GCTCCCTGCATGGAGCCTGCTTCTCCCTCTGCCTGTGTCTCTGCCTCTCTGTCTCTCTGTGTAACATCATGAATAAAATAAAATAAAATCTTTAAAAAAAAAAAAAAAAAAAAAAAAAAAAAAAAA

sdb\_chr4\_86942253 : GATGAAAAGCGCTAATGAGCACTTCAGAGTATGACCCAAATATATCTTATAGATTCTAAAGGTCCA  
s\_chrX\_93595261 : AAAAAAAAAAAAAAAAAAAAAAAAAAAAAAAAAAGAACTGAGTTCTCTGGGTATTCAAGATGGTT

B

sdb\_chr10\_1333648 : ACCGTCGTCTCCAAACAGTGTTATTACAATCTTATTCACTATTGGGACGCCTGGGTGGCTCAGTGGTTGAGCATCTGCCTTTGGCCAGGGCATGATCCCGGAGTCTGGGATCGAGTCCCGCATCGGG  
s\_chr3\_67054234 : GTAGTTAGTCATCATCACAAAGAAGTCATTAATTATGTAAGGAGGGGACGCCTGGGTGGCTCAGTGGTTGAGCATCTGCCTTTGGCCAGGGCATGATCCCGGAGTCTGGGATCGAGTCCCGCATCGGG

sdb\_chr10\_1333648 : CTCCCTGCATGGAGCCTGCTTCTCCCTCTGCCTGTGTCTCTGCCTCTCTCTCTCTGTATCTCTCGTGAATAAAATAAAATAAAATCTTTTTAAAAATCTTATTCACTATATTCCTATGTTGTACTTTT  
s\_chr3\_67054234 : CTCCCTGCATGGAGCCTGCTTCTCCCTCTGCCTGTGTCTCTGCCTCTCTCTCTCTGTATCTCTCGTGAATAAAATAAAATAAAATCTTTAAAAAAAAAAAAAAAAAAAAAAAAAATAATTATGTAAGG

sdb\_chr10\_1333648 : CATTTCTGTGACTTCTTTATTTTATAACTGAAGTTAATACTTCCTAATCCCTTTTATCC  
s\_chr3\_67054234 : GAGGTTTAGGATCATTATTATGCAGGCAGAGTATTGGAACCTATCTTTTGCCATAAAA

C

sdb\_chr3\_87748296 : TGATAGAGAAATGTTAATAATGCAGAATAAAATTAAAGTGTAGGGGATCCCTGGGTGGCTCAGTGGTTGAGCGCTGCCTTTGGCCAGGGCATGATCCTGGAGTCCCGGGATCGAGTCCCACATCGG  
sb\_chr19\_45534426 : AAAACAAACACAATGAACAACCTTGACTTTTAAAAAAGAGCCTAGGGGATCCCTGGGTGGCTCAGTGGTTGAGCGCTGCCTTTGGCCAGGGCATGATCCTGGAGTCCCGGGATCGAGTCCCACATCGG

sdb\_chr3\_87748296 : GCTCCCTGCATAGAGCCTGCTTCTCCCTCCTCTGTGTCTCTGCCTCTCTCTCTCTATGTCTATCATGAATAAAATAAAATAAAATCTTTTTAAAAAGTGTGTCATGTCTATAGGATTACATTGTGAG  
sb\_chr19\_45534426 : GCTCCCTGCATAGAGCCTGCTTCTCCCTCCTCTGTGTCTCTGCCTCTCTCTCTCTATGTCTATCATGAATAAAATAAAATAAAATCTTTAAAAAAAAAAAAACGAAGCCTAGTGTAGCGTCTGCTA

sdb\_chr3\_87748296 : TAGAACAAACATTTGAGGAAATATTCTTCTAGTTTCAGTGAAGATGTAGTTTCATGT  
sb\_chr19\_45534426 : TAAGCACAGTGAGTACAATTTAAATACGGCTGTCTGAATGAAAGATGAAATGAGA

D

sdb\_chr23\_23784402 : AAATGCAAACTGTAAACAGTTCTATAAACTATGGAAGACTGGGGATCCCTGGGTGGCTCAGTGGTCTAGCGCTGCCTTTGGCCAGGGCGTGATCCTGGAGTCCCGGGATCGAGTCCCACATCAGGC  
sdb\_chr1\_26893311 : AATTTAGGATGAGAACAGGGACTCTTTGAAAGATACTTTTAGGGGATCCCTGGGTGGCTCAGTGGTCTAGCGCTGCCTTTGGCCAGGGCGTGATCCTGGAGTCCCGGGATCGAGTCCCACATCAGGC  
s\_chr30\_3143895 : GTGTGCTACAGCAAAGGTTAATTTTTTAAAAATATCATCTCCAGGGGATCCCTGGGTGGCTCAGTGGTCTAGCGCTGCCTTTGGCCAGGGCGTGATCCTGGAGTCCCGGGATCGAGTCCCACATCAGGC

sdb\_chr23\_23784402 : TCCCTGCATGGAACCTGCTTCTCCTTCTGCCTATGCCTCTGCTTCTCTCTTTCTCTGTGTCTCTCATGAATAAAATAAAATAAAATATTTTTAAAAATTTATGGAAGACTTAAGTGAATTTCTAAGAA  
sdb\_chr1\_26893311 : TCCCTGCATGGAACCTGCTTCTCCTTCTGCCTATGCCTCTGCTTCTCTCTTTCTCTGTGTCTCTCATGAATAAAATAAAATAAAATATTTTAAAAAAGAAAGATACTTTTATCTAGAGAAGGATTT

s\_chr30\_3143895 : TCCCTGCATGGAACCTGCTTCTCCTTCTGCCTATGCCTCTGCTTCTCTCTCTTTCT--GTGTCTCTCATGAATAAATAAATAAAATATTAAAAAATAAATATCATCTCCAA

sdb\_chr23\_23784402 : GCTAATAAACATGCAATTTGTTTAATACCTTTGACTAGAAATTTGATAGTGATTGACTG

sdb\_chr1\_26893311 : TCTTTGTTTCAGAAAGAAACATGCGGCTACTGAGACAGTGTAGTTCCACATCTGGAACCTG

s\_chr30\_3143895 : TCAGGAGACTAAGATAGACATGCAAGTTATTGATGAAGTAAGGTATTCTCATTTAATAG

## E

sdb\_chr1\_80441356: GCAAAGTCAATAGAAAGTTCACGTAGAAGCTGCTGGAACCCGGGGATCCCTGGATGGCTCAGCGGTTTGGCGCCTGCCTTTGGCCCAGGGTGCGATCCTGGAGTCCCGGGATCGAGTCCCACGTCAAGGCTC

4\_chr16\_51570943 : TTTATGCACCTAATAACAGAGCTTCAAAATACAGGAAGCAGGGGATCCCTGGATGGCTCAGCGGTTTGGCGCCTGCCTTTGGCCCAGGGTGCGATCCTGGAGTCCCGGGATCGAGTCCCACGTCAAGGCTC

sdb\_chr1\_80441356: CCGGCATGGAGCCTGCTTCTCCCTCTGCCTGTGTCTCTGCCTCTCTCTCTCTCTGTCTATCATGAATGAATAAATAAAATCTTTAAAAAAGAGCAGCTGGAACCCATGTCATGGG

s\_chr16\_51570943 : CCGGCATGGAGCCTGCTTCTCCCTCTGCCTGTGTCTCTGCCTCTCTCTCTCTCTGTCTATCATGAATGAATAAATAAAATCTTTAAAAAAGAGCAGCTGGAACCCATGTCATGGG

sdb\_chr1\_80441356: TATTTCTTACAGCTACTTCAGCTAGTTTCAGAAAAGTAGGCTGGCTTCAGCCTT

s\_chr16\_51570943 : TACAGGAAGCAAAATCTGCTAGAACTGTGAAAAGACAAACCCACAGTTGTAGCTG

## F

sdb\_chr25\_40928195 : GAAAAGTAAACAAATGACTACATAGATTTGAAAGTAGCTTAAAGGGACCCCTGAGTGGCTCAGCGGTTGAGCATCTGCCTTTGGCTCAGGTCATGATCCTGGAGTCCCAGGTTCAAGTCCCACATCGGGC

s\_chr6\_67264924 : TTAATCAGTGCACTTAAAACTGATATTCAAAATGAGTACTGAGGGACCCCTGAGTGGCTCAGCGGTTGAGCATCTGCCTTTGGCTCAGGTCATGATCCTGGAGTCCCAGGTTCAAGTCCCACATCGGGC

sdb\_chr25\_40928195 : TCCCTGCATGGAGCCTGCTTCTCCCTCTGCCTCTGACTCTGCCTCTCTCTCTGTGTCTCTCGTGAATAAATAAATAAAATCTTTTAAAAAGAAAGTAACTTAAAGTTTGCATGAATTTTCCCTACAA

s\_chr6\_67264924 : TCCCTGCATGGAGCCTGCTTCTCCCTCTGCCTCTGACTCTGCCTCTCTCTCTGTGTCTCTCGTGAATAAATAAATAAAATCTTTTAAAAAGAAAGTAACTTAAAGTTTGCATGAATTTTCCCTACAA

sdb\_chr25\_40928195 : TTATCAACACACTAAGAAAACATTAGGGTCATTTCATTTTACATTTTATATAT

s\_chr6\_67264924 : AACAAAATGAGTACTGATATAGTTGGATCAATACATATTATACTTGTTACTATT

## G

sdb\_chr6\_48693053 : GTGTCTCTCAAGAATAAATAAATAAATTTAATGAAAAAATCGGGCAGCCCCGGTGGCGCAGCGGTTTAGTGCCGCCTACAGCCCAGGGCGTGATCCTGGAGACCTGGATCGAGTCCCACGTCAAG

sd\_chr4\_15005893 : GTGCACCTTCTGGAATCTGGATGCCCAATAATAATCTGTTGAATAGGGCAGCCCCGGTGGCGCAGCGGTTTAGTGCCGCCTACAGCCCAGGGCGTGATCCTGGAGACCTGGATCGAGTCCCACGTCAAG

sdb\_chr6\_48693053 : CTCCCTGCGTGGAGCCTGCTTCTCCCTCTGCCTGTGTCTCTGCCTCTCTCTCTCTCTCTCTGTCATCTCTATGAATAAATAAATAAAATCTTTAAAAAGAAAAAATCTCACAAAGTATACAGCC

sd\_chr4\_15005893 : CTCCCTGCGTGGAGCCTGCTTCTCCCTCTGCCTGTGTCTCTGCCTCTCTCTCTCTCTCTCTGTCATCTCTATGAATAAATAAATAAAATCTTTAAAAAGAAAAAATCTCACAAAGTATACAGCC

sdb\_chr6\_48693053 : AAAAGTATCTTACCCTCTTATAATAATTTTCTGTTTACATTATTTAAACATCTTCCGGAAGCA

sd\_chr4\_15005893 : CTGTTGAATAAATGAGTAAATGAATGAACAAATTCTGCCTATGACTGCTTCAGGTTGGTATTA

## H

```
sdb_chr8_3186075 : GAGCAGAGCATTAGGTAGTACCCCAAGATCAAAAGGGTGCTGCACAGGGGCAGCCCAGGTGGCTCAGCGGTTTAGCGCCACCTTCAGCCAGGGCCTGATCCTGGAGACCTGGGATCGAGTCCCGCATCGGG
sd_chr2_64843826 : TGAGAGACAGGGGAGCAAAAAGTCGAGGAGAAAGAGGAGGGAGAGGGGCAGCCCAGGTGGCTCAGCGGTTTAGCGCCACCTTCAGCCAGGGCCTGATCCTGGAGACCTGGGATCGAGTCCCGCATCGGG

sdb_chr8_3186075 : CTCCTGTCATGGAGCCTGCTTCTCCCTCTGCCTGTGTCTCTGCCTCTCTCTCTCTCTCTCTCTGTGTGT--CTCTCATGAATAAATAAATAAAAFCTTTATTAAAAAAAAGGTGCTGTACAGGGAAG
sd_chr2_64843826 : CTCCTGTCATGGAGCCTGCTTCTCCCTCTGCCTGTGTCTCTGCCTCTCTCTCTCTCTCTCTGTGTGTGTCTCTCATGAATAAATAAATAAAAFCTTTAAAAAAAAAAAAAAAAAAAAAAAAA

sdb_chr8_3186075 : CTGTCATTTTACTCTGAAGGCTATCTAGAGACATTTCAATTATTTTTTAAATTTTATTTA
sd_chr2_64843826 : AGAGGAGGGAGAGAGAGAAAGAGGTCTGGGTTCTGAAGTCCGCGCTTGGACAGACTCTCC
```
