# Supplementary material for: Tail Wags Dog’s SINE: Retropositional Mechanisms of Can SINE Depend on Its A-Tail Structure
Source: MDPI journal article supplement (doi:10.3390/biology11101403), 2022-09-26
Supplement: s1 [file s1]

**Table S1.** Examples of mutation-inducing Alu insertions into human genes.

| Gene                     | Alu subfamily            | Poly(A) tail                                       | References                           |
|--------------------------|--------------------------|----------------------------------------------------|--------------------------------------|
| <i>CD40LG</i>            | Yb8                      | A <sub>13</sub>                                    | Apoil <i>et al.</i> (2007)           |
| <i>EYA1</i>              | Ya5                      | A <sub>97</sub> mother<br>A <sub>37</sub> daughter | Abdelhak <i>et al.</i> (1997)        |
| <i>FGFR2</i>             | Ya5 case 1<br>Yb8 case 2 | A <sub>69</sub><br>A <sub>44-50</sub>              | Oldridge <i>et al.</i> (1999)        |
| <i>ChE</i>               | Yb8                      | A <sub>38</sub>                                    | Muratani <i>et al.</i> , (1991)      |
| <i>C1 inhibitor</i>      | Y                        | A <sub>57</sub>                                    | Stoppa-Lyonnet <i>et al.</i> (1991)  |
| <i>BRCA2</i>             | Y                        | A <sub>64</sub>                                    | Miki <i>et al.</i> (1996)            |
| <i>GK</i>                | Y                        | A <sub>74</sub>                                    | Zhang <i>et al.</i> (2000)           |
| <i>CLCN5</i>             | Ya5                      | A <sub>48-53</sub>                                 | Claverie-Martin <i>et al.</i> (2003) |
| <i>HESX1</i>             | Yb8                      | A <sub>31</sub>                                    | Sobrier <i>et al.</i> , (2005)       |
| <i>CFTR ex 16 ex 17b</i> | Y<br>Ya5                 | A <sub>57</sub><br>A <sub>56</sub>                 | Chen <i>et al.</i> (2007)            |
| <i>PTEN</i>              | Ya5<br>Yb8               | A <sub>40</sub><br>A <sub>31</sub>                 | Crivelli <i>et al.</i> (2017)        |
| <i>ATP7A</i>             | Ya5a2                    | A <sub>89</sub>                                    | Gu <i>et al.</i> (2007)              |
| <i>PKLR</i>              | Yb9                      | A <sub>72</sub>                                    | Lesmana <i>et al.</i> (2018)         |
| <i>LPL</i>               | YB9                      | A <sub>&gt;60</sub>                                | Okubo <i>et al.</i> (2007)           |
| <i>GNPTAB</i>            | ???                      | A <sub>17</sub>                                    | Tappino <i>et al.</i> (2007)         |
| <i>FGFR2</i>             | Yk13                     | A <sub>12</sub>                                    | Bochukova <i>et al.</i> (2009)       |
| <i>FBP1</i>              | Ya5                      | A <sub>49</sub>                                    | Ramakrishna <i>et al.</i> , (2017)   |
| <i>POMT1</i>             | Ya5                      | A <sub>-53</sub>                                   | Bouchet <i>et al.</i> (2007)         |
| <i>OPA1</i>              | Yb8                      | A <sub>25</sub>                                    | Gallus <i>et al.</i> (2010)          |
| <i>APC</i>               | Yb8                      | A <sub>42</sub>                                    | Halling <i>et al.</i> (1999)         |
| <i>BTK</i>               | Y                        | A <sub>74</sub>                                    | Conley <i>et al.</i> (2005)          |
| <i>CAR</i>               | Ya5                      | A <sub>92-94</sub>                                 | Janicic <i>et al.</i> (1995)         |
| <i>CRB1</i>              | Y                        | A <sub>&gt;70</sub>                                | den Hollander <i>et al.</i> (1999)   |
| <i>F9</i>                | Ya/Yb                    | A <sub>40</sub>                                    | Li <i>et al.</i> (2001)              |
| <i>HMBS</i>              | Ya5                      | A <sub>39</sub>                                    | Mustajoki <i>et al.</i> (1999)       |
| <i>NF1</i>               | Ya5                      | A <sub>&gt;40</sub>                                | Wallace <i>et al.</i> (1991)         |
| <i>TNFRSF6</i>           | AluYa5                   | A <sub>34</sub>                                    | Tighe <i>et al.</i> (2002)           |

|    |        |                 |                               |
|----|--------|-----------------|-------------------------------|
| F8 | AluYb8 | A <sub>47</sub> | Sukarova <i>et al.</i> (2001) |
|----|--------|-----------------|-------------------------------|

## References

91. Abdelhak, S.; Kalatzis, V.; Heilig, R.; Compain, S.; Samson, D.; Vincent, C.; Levi-Acobas, F.; Cruaud, C.; Le Merrer, M.; Mathieu, M.; et al. Clustering of mutations responsible for branchio-oto-renal (BOR) syndrome in the eyes absent homologous region (eyaHR) of EYA1. *Hum. Mol. Genet.* **1997**, *6*, 2247–2255. <https://doi.org/10.1093/hmg/6.13.2247>.
92. Apoil, P.A.; Kuhlein, E.; Robert, A.; Rubie, H.; Blancher, A. HIGM syndrome caused by insertion of an AluYb8 element in exon 1 of the CD40LG gene. *Immunogenetics* **2006**, *59*, 17–23. <https://doi.org/10.1007/s00251-006-0175-5>.
93. Bochukova, E.G.; Roscioli, T.; Hedges, D.J.; Taylor, I.B.; Johnson, D.; David, D.J.; Deininger, P.L.; Wilkie, A.O. Rare mutations offFGFR2causing apert syndrome: identification of the first partial gene deletion, and anAluelement insertion from a new subfamily. *Hum. Mutat.* **2009**, *30*, 204–211. <https://doi.org/10.1002/humu.20825>.
94. Bouchet, C.; Vuillaumier-Barrot, S.; Gonzales, M.; Boukari, S.; Le Bizec, C.; Fallet, C.; Delezoide, A.-L.; Moiro, H.; Laquerriere, A.; Encha-Razavi, F.; et al. Detection of an Alu insertion in the POMT1 gene from three French Walker Warburg syndrome families. *Mol. Genet. Metab.* **2007**, *90*, 93–96. <https://doi.org/10.1016/j.ymgme.2006.09.005>.
95. Chen, J.-M.; Masson, E.; Macek, M.; Raguénès, O.; Piskackova, T.; Fercot, B.; Fila, L.; Cooper, D.N.; Audrézet, M.-P.; Férec, C. Detection of two Alu insertions in the CFTR gene. *J. Cyst. Fibros.* **2008**, *7*, 37–43. <https://doi.org/10.1016/j.jcf.2007.04.001>.
96. Claverie-Martin, F.; González-Acosta, H.; Flores, C.; Antón-Gamero, M.; García-Nieto, V. *De novo* insertion of an Alu sequence in the coding region of the CLCN5 gene results in Dent's disease. *Hum. Genet.* **2003**, *113*, 480–485. <https://doi.org/s00439-003-0991-8>.
97. Conley, M.E.; Partain, J.D.; Norland, S.M.; Shurtleff, S.A.; Kazazian, H.H. Two independent retrotransposon insertions at the same site within the coding region of BTK. *Hum. Mutat.* **2005**, *25*, 324–325. <https://doi.org/10.1002/humu.9321>.
98. Crivelli, L.; Bubien, V.; Jones, N.; Chiron, J.; Bonnet, F.; Barouk-Simonet, E.; Couzigou, P.; Sevenet, N.; Caux, F.; Longy, M. Insertion of Alu elements at a PTEN hotspot in Cowden syndrome. *Eur. J. Hum. Genet.* **2017**, *25*, 1087–1091. <https://doi.org/10.1038/ejhg.2017.81>
99. Hollander, A.I.D.; Brink, J.B.T.; De Kok, Y.J.; Van Soest, S.; Born, L.I.V.D.; Van Driel, M.A.; Van De Pol, D.J.; Payne, A.; Bhattacharya, S.S.; Kellner, U.; et al. Mutations in a human homologue of Drosophila crumbs cause retinitis pigmentosa (RP12). *Nat. Genet.* **1999**, *23*, 217–221. <https://doi.org/10.1038/13848>.
100. Gallus, G.N.; Cardaioli, E.; Rufa, A.; Da Pozzo, P.; Bianchi, S.; D'Eramo, C.; Collura, M.; Tumino, M.; Pavone, L.; Federico, A. Alu-element insertion in an OPA1 intron sequence associated with autosomal dominant optic atrophy. *Mol. Vis.* **2010**, *16*, 178–183.
101. Gu, Y.; Kodama, H.; Watanabe, S.; Kikuchi, N.; Ishitsuka, I.; Ozawa, H.; Fujisawa, C.; Shiga, K. The first reported case of Menkes disease caused by an Alu insertion mutation. *Brain Dev.* **2007**, *29*, 105–108.
102. Halling, K.C.; Lazzaro, C.R.; Honchel, R.; Bufill, J.A.; Powell, S.M.; Arndt, C.A.; Lindor, N.M. Hereditary Desmoid Disease in a Family with a Germline Alu I Repeat Mutation of the APC Gene. *Hum. Hered.* **1999**, *49*, 97–102. <https://doi.org/10.1159/000022852>.
103. Janicic, N.; Pausova, Z.; Cole, D.E.; Hendy, G.N. Insertion of an Alu sequence in the Ca(2+)-sensing receptor gene in familial hypocalciuric hypercalcemia and neonatal severe hyperparathyroidism. *Am. J. Hum. Genet.* **1995**, *56*, 880–886.
104. Lesmana, H.; Dyer, L.; Li, X.; Denton, J.; Griffiths, J.; Chonat, S.; Seu, K.G.; Heeney, M.M.; Zhang, K.; Hopkin, R.J.; et al. Alu element insertion inPKLRgene as a novel cause of pyruvate kinase deficiency in Middle Eastern patients. *Hum. Mutat.* **2018**, *39*, 389–393. <https://doi.org/10.1002/humu.23392>.
105. Li, X.; Scaringe, W.A.; Hill, K.; Roberts, S.; Mengos, A.; Careri, D.; Pinto, M.T.; Kasper, C.K.; Sommer, S.S. Frequency of recent retrotransposition events in the human factor IX gene. *Hum. Mutat.* **2001**, *17*, 511–519. <https://doi.org/10.1002/humu.1134>.
106. Miki, Y.; Katagiri, T.; Kasumi, F.; Yoshimoto, T.; Nakamura, Y. Mutation analysis in the BRCA2 gene in primary breast cancers. *Nat. Genet.* **1996**, *13*, 245–247. <https://doi.org/10.1038/ng0696-245>.
107. Muratani, K.; Hada, T.; Yamamoto, Y.; Kaneko, T.; Shigeto, Y.; Ohue, T.; Furuyama, J.; Higashino, K. Inactivation of the cholinesterase gene by Alu insertion: possible mechanism for human gene transposition. *Proc. Natl. Acad. Sci.* **1991**, *88*, 11315–11319. <https://doi.org/10.1073/pnas.88.24.11315>.
108. Mustajoki, S.; Ahola, H.; Mustajoki, P.; Kauppinen, R. Insertion of Alu element responsible for acute intermittent porphyria. *Hum. Mutat.* **1999**, *13*, 431–438.

109. Okubo, M.; Horinishi, A.; Saito, M.; Ebara, T.; Endo, Y.; Kaku, K.; Murase, T.; Eto, M. A novel complex deletion–insertion mutation mediated by Alu repetitive elements leads to lipoprotein lipase deficiency. *Mol. Genet. Metab.* **2007**, *92*, 229–233. <https://doi.org/10.1016/j.ymgme.2007.06.018>.
110. Oldridge, M.; Zackai, E.H.; McDonald-McGinn, D.M.; Iseki, S.; Morriss-Kay, G.M.; Twigg, S.R.; Johnson, D.; Wall, S.A.; Jiang, W.; Theda, C.; et al. De Novo Alu-Element Insertions in FGFR2 Identify a Distinct Pathological Basis for Apert Syndrome. *Am. J. Hum. Genet.* **1999**, *64*, 446–461. <https://doi.org/10.1086/302245>.
111. Ramakrishna, S.H.; Patil, S.J.; Jagadish, A.A.; Sapare, A.K.; Sagar, H.; Kannan, S. Fructose-1,6-bisphosphatase deficiency caused by a novel homozygous Alu element insertion in the FBP1 gene and delayed diagnosis. *J. Pediatr. Endocrinol. Metab.* **2017**, *30*, 703–706.
112. Sobrier, M.-L.; Netchine, I.; Heinrichs, C.; Thibaud, N.; Vié-Luton, M.-P.; Van Vliet, G.; Amselem, S. Alu-element insertion in the homeodomain of HESX1 and aplasia of the anterior pituitary. *Hum. Mutat.* **2005**, *25*, 503–503. <https://doi.org/10.1002/humu.9332>.
113. Stoppa-Lyonnet, D.; E Carter, P.; Meo, T.; Tosi, M. Clusters of intragenic Alu repeats predispose the human C1 inhibitor locus to deleterious rearrangements. *Proc. Natl. Acad. Sci.* **1990**, *87*, 1551–1555. <https://doi.org/10.1073/pnas.87.4.1551>.
114. Sukarova, E.; Dimovski, A.; Tchacarov, P.; Petkov, G.; Efremov, G. An Alu Insert as the Cause of a Severe Form of Hemophilia A. *Acta Haematol.* **2001**, *106*, 126–129. <https://doi.org/10.1159/000046602>.
115. Tappino, B.; Regis, S.; Corsolini, F.; Filocamo, M. An Alu insertion in compound heterozygosity with a microduplication in GNPTAB gene underlies Mucopolysaccharidosis II. *Mol. Genet. Metab.* **2008**, *93*, 129–133. <https://doi.org/10.1016/j.ymgme.2007.09.010>.
116. Tighe, P.J.; E Stevens, S.; Dempsey, S.; Le Deist, F.; Rieux-Laucat, F.; Edgar, J.D.M. Inactivation of the Fas gene by Alu insertion: retrotransposition in an intron causing splicing variation and autoimmune lymphoproliferative syndrome. *Genes Immun.* **2002**, *3*, S66–S70.
117. Wallace, M.R.; Andersen, L.B.; Saulino, A.M.; Gregory, P.E.; Glover, T.W.; Collins, F.S. A de novo Alu insertion results in neurofibromatosis type 1. *Nature* **1991**, *353*, 864–866. <https://doi.org/10.1038/353864a0>.
118. Zhang, Y.H.; Dipple, K.M.; Vilain, E.; Huang, B.L.; Finlayson, G.; Therrell, B.L.; Worley, K.; Deininger, P.; McCabe, E.R. AluY insertion (IVS4-52ins316alu) in the glycerol kinase gene from an individual with benign glycerol kinase deficiency. *Hum. Mutat.* **2000**, *15*, 316–323.
