# Supplementary material for: Tail Wags Dog’s SINE: Retropositional Mechanisms of Can SINE Depend on Its A-Tail Structure
Source: MDPI journal article supplement (doi:10.3390/biology11101403), 2022-09-26
Supplement: s1 [file s1]

## A

```
sdb_chr4_18735131 : TTTTAAAGGCATATGCAAGGCTGATTAGAAAGATTTTTCTTGGGATCCCTGGGTGGCGCAGCGGTTTAGCGCCTGCCTTTGGCCAGGGCGCGATCCTGGAGACCCGGGATCGAATCCCACATCGGGCTCCCGGTGCA
sb_chr25_22335108 : ATTAAGCAACAGTCTGACTTCTAATTAAACTCAGAAGAGGGGGATCCCTGGGTGGCGCAGCGGTTTAGCGCCTGCCTTTGGCCAGGGCGCGATCCTGGAGACCCGGGATCGAATCCCACATCGGGCTCCCGGTGCA
sd_chr11_43885208 : TCTATGGTTTGGAGATTTTGTCTTACGATTTCAAAGATTCTTGGGATCCCTGGGTGGCGCAGCGGTTTAGCGCCTGCCTTTGGCCAGGGCGCGATCCTGGAGACCCGGGATCGAATCCCACATCGGGCTCCCGGTGCA
s_chr2_73397586 : GGACGTGGAGCGTCTGAGAGTTAGAAGGAAGGCAAACTGAGCGGGATCCCTGGGTGGCGCAGCGGTTTAGCGCCTGCCTTTGGCCAGGGCGCGATCCTGGAGACCCGGGATCGAATCCCACATCGGGCTCCCGGTGCA
s_chrd_21494389 : CTCTCTGTCTATCATGAATAAAATAAAATCTTAAAAAATCGGGATCCCTGGGTGGCGCAGCGGTTTAGCGCCTGCCTTTGGCCAGGGCGCGATCCTGGAGACCCGGGATCGAATCCCACATCGGGCTCCCGGTGCA
s_chr10_28939323 : CAGTGACCCCAAGCAAGATAAACACAAAAGAACTATATCTCAAGGATCCCTGGGTGGCGCAGCGGTTTAGCGCCTGCCTTTGGCCAGGGCGCGATCCTGGAGACCCGGGATCGAATCCCACATCGGGCTCCCGGTGCA
s_chr12_1335528 : CTGTAGTATAATTATGAGAAAAATATTAGATAAACTAAATTTGAGGGATCCCTGGGTGGCGCAGCGGTTTAGCGCCTGCCTTTGGCCAGGGCGCGATCCTGGAGACCCGGGATCGAATCCCACATCGGGCTCCCGGTGCG
s_chr21_25977316 : AAAACAATCTGACAAAAAGACATATCAAGTCTTGGAAAGGAAGGGATCCCTGGGTGGCGCAGCGGTTTAGCGCCTGCCTTTGGCCAGGGCGCGATCCTGGAGACCCGGGATCGAATCCCACATCGGGCTCCCGGTGCA
s_chr21_28612163 : GCATCATACTAATTAATCAATTAACATTAATAATTATATATATAGGGATCCCTGGGTGGCGCAGCGGTTTAGCGCCTGCCTTTGGCCAGGGCGCGATCCTGGAGACCCGGGATCGAATCCCACATCGGGCTCCCGGTGCA
```

```
sdb_chr4_18735131 : TGGAGCCTGTTTCTCCCTCTGCCTGTGTCTCTGCCTCTCTCGCTCTCTCTGTGTGACTATCATAAAATAAATAAAATTTTAAAAAGAAAGATTTTCTTGTTCCTTTTGAACATAGCATATGTTTATGTG
sb_chr25_22335108 : TGGAGCCTGTTTCTCCCTCTGCCTGTGTCTCTGCCTCTCTCGCTCTCTCTGTGTGACTATCATAAAATAAATAAAATTTTAAAAAGAAAGATTTTCTTGTTCCTTTTGAACATAGCATATGTTTATGTG
sd_chr11_43885208 : TGGAGCCTGTTTCTCCCTCTGCCTGTGTCTCTGCCTCTCTCGCTCTCTCTGTGTGACTATCATAAAATAAATAAAATTTTAAAAAGAAAGATTTTCTTGTTCCTTTTGAACATAGCATATGTTTATGTG
s_chr2_73397586 : TGGAGCCTGTTTCTCCCTCTGCCTGTGTCTCTGCCTCTCTCGCTCTCTCTGTGTGACTATCATAAAATAAATAAAATTTTAAAAAGAAAGATTTTCTTGTTCCTTTTGAACATAGCATATGTTTATGTG
s_chrd_21494389 : TGGAGCCTGTTTCTCCCTCTGCCTGTGTCTCTGCCTCTCTCGCTCTCTCTGTGTGACTATCATAAAATAAATAAAATTTTAAAAAGAAAGATTTTCTTGTTCCTTTTGAACATAGCATATGTTTATGTG
s_chr10_28939323 : TGGAGCCTGTTTCTCCCTCTGCCTGTGTCTCTGCCTCTCTCGCTCTCTCTGTGTGACTATCATAAAATAAATAAAATTTTAAAAAGAAAGATTTTCTTGTTCCTTTTGAACATAGCATATGTTTATGTG
s_chr12_1335528 : TGGAGCCTGTTTCTCCCTCTGCCTGTGTCTCTGCCTCTCTCGCTCTCTCTGTGTGACTATCATAAAATAAATAAAATTTTAAAAAGAAAGATTTTCTTGTTCCTTTTGAACATAGCATATGTTTATGTG
s_chr21_25977316 : TGGAGCCTGTTTCTCCCTCTGCCTGTGTCTCTGCCTCTCTCGCTCTCTCTGTGTGACTATCATAAAATAAATAAAATTTTAAAAAGAAAGATTTTCTTGTTCCTTTTGAACATAGCATATGTTTATGTG
s_chr21_28612163 : TGGAGCCTGTTTCTCCCTCTGCCTGTGTCTCTGCCTCTCTCGCTCTCTCTGTGTGACTATCATAAAATAAATAAAATTTTAAAAAGAAAGATTTTCTTGTTCCTTTTGAACATAGCATATGTTTATGTG
```

## B

```
sdb_chr13_10329919 : AAATCTACAACAAAAGGAAAAAACTACTAATACTTGTTTTTAAACTCATGAGTGGGATCCCTGGGTGGTGCAGCGGTTTAGCGCCTGCCTTTGGCCAGGGCGGGATCCTGGAGACCCGGATCGAATCCCACATCGG
sdb_chr28_15881633 : TTTTAAATAACATTTTAAACTATTTCATGTTTGCCCTTTAGATATCATGAATGGTGGGATCCCTGGGTGGTGCAGCGGTTTAGCACCTGCCTTTGGCCAGGGCGGGATCCTGGAGACCCGGATCGAATCCCACATCGG
sd_chr8_30038422 : TGTCTTTTCTTTTGTCTTTAGGTTTCCATTAAATGAGGTTTAAAAATGTGACATATTGGGATCCCTGGGTGGTGCAGCGGTTTAGCGCCTGCCTTTGGCCAGGGCGGGATCCTGGAGACCCGGATCGAATCCCACATCGG
s_chr10_45100520 : TATAACTTTGAAAATGATAAATAAAAAATTTAAAAAAGAAAGAAAGGGATCCCTGGGTGGTGCAGCGGTTTAGCGCCTGCCTTTGGCCAGGGCGGGATCCTGGAGACCCGGATCGAATCCCACATCGG
s_chr22_48619613 : GTAAAGCAGGAGAGGATGAACCTGTGGGATGTGGGAGAGAAAGACCATGAGGGGATCCCTGGGTGGTGCAGCGGTTTAGCGCCTGCCTTTGGCCAGGGCGGGATCCTGGAGACCCGGATCGAATCCCACATCGG
s_chr27_15328787 : GTGCTCCTCAATTTATTTCTCTGGAACATAATTTTAAACGGTTGAAAAAATAGGGATCCCTGGGTGGTGCAGCGGTTTAGCGCCTGCCTTTGGCCAGGGCGGGATCCTGGAGACCCGGATCGAATCCCACATCGG
```

```
sdb_chr13_10329919 : GCTCCTGGTGCATGGAGCCTGCTTCTCCCTCTGCCTCTGTCTCTGCCTCTCTCTCTCTCTCTCTGTGTGCCTATCATAAAATAAATAAAATTTTAAACTCATGAGTTATAATAATGAAAAACAAATTTGTCTATTTT
sdb_chr28_15881633 : GCTCCTGGTGCATGGAGCCTGCTTCTCCCTCTGCCTCTGTCTCTGCCTCTCTCTCTCTCTCTCTGTGTGCCTATCATAAAATAAATAAAATTTTAAAGAAATCATGAATGGTGGGATCCCTGGGTGGTGCAGCGGTTTAGCACCTGCCTTTGGCCAGGGCGGGATCCTGGAGACCCGGATCGAATCCCACATCGG
sd_chr8_30038422 : GCTCCTGGTGCATGGAGCCTGCTTCTCCCTCTGCCTCTGTCTCTGCCTCTCTCTCTCTCTCTCTGTGTGCCTATCATAAAATAAATAAAATTTTAAAGAAATCATGAATGGTGGGATCCCTGGGTGGTGCAGCGGTTTAGCACCTGCCTTTGGCCAGGGCGGGATCCTGGAGACCCGGATCGAATCCCACATCGG
s_chr10_45100520 : GCTCCTGGTGCATGGAGCCTGCTTCTCCCTCTGCCTCTGTCTCTGCCTCTCTCTCTCTCTCTCTGTGTGCCTATCATAAAATAAATAAAATTTTAAAGAAATCATGAATGGTGGGATCCCTGGGTGGTGCAGCGGTTTAGCACCTGCCTTTGGCCAGGGCGGGATCCTGGAGACCCGGATCGAATCCCACATCGG
s_chr22_48619613 : GCTCCTGGTGCATGGAGCCTGCTTCTCCCTCTGCCTCTGTCTCTGCCTCTCTCTCTCTCTCTCTGTGTGCCTATCATAAAATAAATAAAATTTTAAAGAAATCATGAATGGTGGGATCCCTGGGTGGTGCAGCGGTTTAGCACCTGCCTTTGGCCAGGGCGGGATCCTGGAGACCCGGATCGAATCCCACATCGG
s_chr27_15328787 : GCTCCTGGTGCATGGAGCCTGCTTCTCCCTCTGCCTCTGTCTCTGCCTCTCTCTCTCTCTCTCTGTGTGCCTATCATAAAATAAATAAAATTTTAAAGAAATCATGAATGGTGGGATCCCTGGGTGGTGCAGCGGTTTAGCACCTGCCTTTGGCCAGGGCGGGATCCTGGAGACCCGGATCGAATCCCACATCGG
```

## C

```
sdb_chr32_29446401 : AGTTAGGAACGGCATTAAATAACCACTCAAGGATCCCTGGGTGGCGCAGCGGTTTGGCCCTGCCTTTGGCCAGGGCGCGATCCTGGAGACCCGGGATCGAATCCCACGTCGGGCTCCCGGTGCATGGAGCCTGCCTT
sdb_chr21_35137886 : GCTAGTTTCCAAGATCTATAAGAACTTATGAGGATCCCTGGGTGGCGCAGCGGTTTGGCCCTGCCTTTGGCCAGGGCGCGATCCTGGAGACCCGGGATCGAATCCCACGTCGGGCTCCCGGTGCATGGAGCCTGCCTT
sb_chr5_4150859 : TTTCTATTTTTTATTAAATTCAGTTAGCCCGGGATCCCTGGGTGGCGCAGCGGTTTGGCCCTGCCTTTGGCCAGGGCGCGATCCTGGAGACCCGGGATCGAATCCCACGTCGGGCTCCCGGTGCATGGAGCCTGCCTT
sb_chr9_28986670 : TATGATTATGAGAATAAAATATAAGGTGGGGGATCCCTGGGTGGCGCAGCGGTTTGGCCCTGCCTTTGGCCAGGGCGCGATCCTGGAGACCCGGGATCGAATCCCACGTCGGGCTCCCGGTGCATGGAGCCTGCCTT
s_chr10_63108935 : AGCAGCATGTTGAAATGGAAGACCCAGGAGGGATCCCTGGGTGGCGCAGCGGTTTGGCCCTGCCTTTGGCCAGGGCGCGATCCTGGAGACCCGGGATCGAATCCCACGTCGGGCTCCCGGTGCATGGAGCCTGCCTT
s_chr19_8079380 : AAATGGAGTCAAAATACAAATATATCTACTAGGATCCCTGGGTGGCGCAGCGGTTTGGCCCTGCCTTTGGCCAGGGCGCGATCCTGGAGACCCGGGATCGAATCCCACGTCGGGCTCCCGGTGCATGGAGCCTGCCTT
s_chr38_2841348 : AGGTAAGTACCATAAGAAAAATCATAGGATGAGGATCCCTGGGTGGCGCAGCGGTTTGGCCCTGCCTTTGGCCAGGGCGCGATCCTGGAGACCCGGGATCGAATCCCACGTCGGGCTCCCGGTGCATGGAGCCTGCCTT
d_chr3_75728882 : CCTACAAATTAATTAATTTTCAAGTTATGTTAGGATCCCTGGGTGGCGCAGCGGTTTGGCCCTGCCTTTGGCCAGGGCGCGATCCTGGAGACCCGGGATCGAATCCCACGTCGGGCTCCCGGTGCATGGAGCCTGCCTT
d_chrs_80918532 : AAGTTAAATTAACCTTTCAAAGTTATGTTAGGATCCCTGGGTGGCGCAGCGGTTTGGCCCTGCCTTTGGCCAGGGCGCGATCCTGGAGACCCGGGATCGAATCCCACGTCGGGCTCCCGGTGCATGGAGCCTGCCTT
```

D

[illegible]

## E

[illegible]

**F**

|                     |                                   |                    |       |                              |                                                                                           |
|---------------------|-----------------------------------|--------------------|-------|------------------------------|-------------------------------------------------------------------------------------------|
| sdb_chr27_46295813: | CTGCTTCTCCCTCTGCCTGTGTCTCTGCCTCTC | CTCTCTCTCT         | ----- | GTGACTATCCCTAAATAAATAAATAAAA | - <b>TATTTT</b> <b>AAAAAAAAAAAAAAAAAAAAAAAAAAAA</b> <b>GAAAT</b> GTGTGTCATCAAGGAAGAAACATT |
| sdb_chr9_1474920:   | CTGCTTCTCCCTCTGCCTGTGTCTCTGCCTCTC | CTCTCTCTCTCTCTCT-  | ----- | GTGACTATCCCTAAATAAATAAATAAAA | - <b>TATTTT</b> <b>AAAAATTAATAATTAATAATCAACAAGTGACAAACGAGAATGTGGACAGCAAT</b>              |
| sdb_chr23_22955549: | CTGCTTCTCCCTCTGCCTGTGTCTCTGCCTCTC | CTCTCTCTCTCTCTCTCT | ----- | GTGACTATCCCTAAATAAATAAATAAAA | - <b>TATTTT</b> <b>AAAAAAAAAAGATTTTTTAAAAAACCAACCAAGGACCTTTTTGAGGAGCATATTTATTT</b>        |
| sdb_chr12_11820650: | CTGCTTCTCCCTCTGCCTGTGTCTCTGCCTCTC | CTCTCTCTCTCTCT     | ----- | GTGACTATCCCTAAATAAATAAATAAAA | - <b>TATTTT</b> <b>AAAAAAAAATAATTAATTAATTAATGCGCAGTTAATATTTTCAGGCCATTACACTTAGT</b>        |
| sdb_chr1_99860703:  | CTGCTTCTCCCTCTGCCTGTGTCTCTGCCTCTC | CTCTCTCTCATCT      | ----- | GTGACTATCCCTAAATAAATAAATAAAA | - <b>TATTTT</b> <b>CAAAAAAATAAAAAAAGATGAAATATTTGGAAATAATGAGTACTCATGACGTTT</b>             |
| sdb_chrX_117917331: | CTGCTTCTCCCTCTGCCTGTGTCTCTGCCTCTC | CTCTCTCTCTCTCTCT-  | ----- | GTGACTATCCCTAAATAAATAAATAAAA | - <b>TATTTT</b> <b>AAAAAATACATAGAAATAAAATTAATTTTGCTTGAACAGAAATTTAGATGCTTTAT</b>           |
| sd_chr16_25666060:  | CTGCTTCTCCCTCTGCCTGTGTCTCTGCCTCTC | CTCTCTCTCTCT       | ----- | GTGACTATCCCTAAATAAATAAATAAAA | - <b>TATTTT</b> <b>AAAAAAAAAAAAAGAGATTTAGGCTTTTCTTATCTTCAAATGAGAGATAGAGCAATCTA</b>        |
| db_chr17_52597474:  | CTGCTTCTCCCTCTGCCTGTGTCTCTGCCTCTC | CTCTCTCTCTCTCT     | ----- | GTGACTATCCCTAAATAAATAAATAAAA | - <b>TATTTT</b> <b>AAAAAAAAAAAAAAAAAAAAAGGCTTTTAACTTTCTAGAGAAGTTAAAGAGCGCTAGTTAGT</b>     |
| chr2_2140389:       | CTGCTTCTCCCTCTGCCTGTGTCTCTGCCTCTC | CTCTCTCTCTCTCTCT-  | ----- | GTGACTATCCCTAAATAAATAAATAAAA | - <b>TATTTT</b> <b>AAAAAAAAAAAAAAAAAAAAAGCACATCCATAGAAATTCCTATAAGCTGTACCTCCC</b>          |
| sb_chr37_12152614:  | CTGCTTCTCCCTCTGCCTGTGTCTCTGCCTCTC | CTCTCTCTCTCT       | ----- | GTGACTATCCCTAAATAAATAAATAAAA | - <b>TATTTT</b> <b>AAAAAAAAAAAAAAAAAAAAAACAAGCAAAACAAAACACGAAGATTTTCTTGTAAG</b>           |
| s_chr10_45498530:   | CTGCTTCTCCCTCTGCCTGTGTCTCTGCCTCTC | CTCTCTCTCTCTCT     | ----- | GTGACTATCCCTAAATAAATAAATAAAA | - <b>TATTTT</b> <b>AAAAAAAAAAAAAAAAAAAAAAGAAATCAGCTATTCTATTACTGAGATTTTCTTGCA</b>          |
| s_chr11_48191499:   | CTGCTTCTCCCTCTGCCTGTGTCTCTGCCTCTC | CTCTCTCTCTCTCTCT-  | ----- | GTGACTATCCCTAAATAAATAAATAAAA | - <b>TATTTT</b> <b>AAAAAATAATGTCTTTTAGAGAAATTTGTGCTATAGAACTATAGTAGTTTCATAAGAA</b>         |
| s_chr12_29180986:   | CTGCTTCTCCCTCTGCCTGTGTCTCTGCCTCTC | CTCTCTCTCTCTCTCT-  | ----- | GTGACTATCCCTAAATAAATAAATAAAA | - <b>TATTTT</b> <b>AAAAAAAAAAAAAAAAAAAAAAGAATTTCAACTTGAGATGTGCTCCAATATACATTTT</b>         |
| s_chr15_51391944:   | CTGCTTCTCCCTCTGCCTGTGTCTCTGCCTCTC | CTCTCTCTCATCT      | ----- | GTGACTATCCCTAAATAAATAAATAAAA | - <b>TATTTT</b> <b>AAAAAAAAAAAAAAAAAAAAAATAAAAAAACTACTAGTTATTATTAACAACCAACCTATC</b>       |
| s_chr20_41761467:   | CTGCTTCTCCCTCTGCCTGTGTCTCTGCCTCTC | CTCTCTCTCTCT       | ----- | GTGACTATCCCTAAATAAATAAATAAAA | - <b>TATTTT</b> <b>AAAAAAAAAAAAAGGGGATCCCTGGGTGGCGCAGCGGTTTGGCGCCTGCCTTTGGG</b>           |
| d_chr11_33750410:   | CTGCTTCTCCCTCTGCCTGTGTCTCTGCCTCTC | CTCTCTCTCTCTCTCT-  | ----- | GTGACTATCCCTAAATAAATAAATAAAA | - <b>TATTTT</b> <b>AAAAAGAAAAAATAAAAAAAAAAAGAAAGGGCATTTGTGGTGGCGAGGATGGGAAG</b>           |
| b_chr14_34729551:   | CTGCTTCTCCCTCTGCCTGTGTCTCTGCCTCTC | CTCTCTCTCTCT       | ----- | GTGACTATCCCTAAATAAATAAATAAAA | - <b>TATTTT</b> <b>AAAAAAAAAAAAAAAAAAAAAAGGACAAAGGAGGCTGTCAATGAGCCATCTCTC</b>             |

## G

```
sdb_chr2_42598276 : GCTGCTCAAGAAATATTATCAGCTTGGGGATCCCCTGGGTGGCGCAGTGGTTTGGCGCCTGCCTTTGGCCCGGGGCGTGATCCTGGAGACCCGGGATCGAATCCCAGCTGGGGCTCCCAGTGCATGGAGCCTGCCTTCTCCCT
sb_chr15_63154005 : ATGTAATAATAAAAAATAGTTTATCCGGGATCCCCTGGGTGGCGCAGTGGTTTGGCGCCTGCCTTTGGCCCGGGGCGTGATCCTGGAGACCCGGGATCGAATCCCAGCTGGGGCTCCCAGTGCATGGAGCCTGCCTTCTCCCT
s_chr28_20671404 : TAAACTATCTCAAAAGATTTCCTGGGGATCCCCTGGGTGGCGCAGTGGTTTGGCGCCTGCCTTTGGCCCGGGGCGTGATCCTGGAGACCCGGGATCGAATCCCAGCTGGGGCTCCCAGTGCATGGAGCCTGCCTTCTCCCT
```
