# Supplementary material for: Tail Wags Dog’s SINE: Retropositional Mechanisms of Can SINE Depend on Its A-Tail Structure
Source: Biology (Basel). 2022 Sep 26;11(10):1403. doi: 10.3390/biology11101403 (PMC9599045; doi:10.3390/biology11101403)
Supplement: Supplementary file 1 [file biology-11-01403-s001.zip › Figure S11. Original image of full western blot.pdf]

Can-T  
Can-C  
sub $\beta$   
sub $\beta$ -R  
cons

Can-C  
Can-T  
 $\Delta 14$   $\Delta 35$   $\Delta 53$   $\Delta 64$   $\Delta 69$   $\Delta 82$   $\Delta 16$   
sub\_t
