# Supplementary figures and images for: Tail Wags Dog’s SINE: Retropositional Mechanisms of Can SINE Depend on Its A-Tail Structure
Source: MDPI journal article supplement (doi:10.3390/biology11101403), 2022-09-26

Can-T  
Can-C  
sub $\beta$   
sub $\beta$ -R  
cons

Can-C  
Can-T  
 $\Delta 14$   $\Delta 35$   $\Delta 53$   $\Delta 64$   $\Delta 69$   $\Delta 82$   $\Delta 16$   
sub\_t

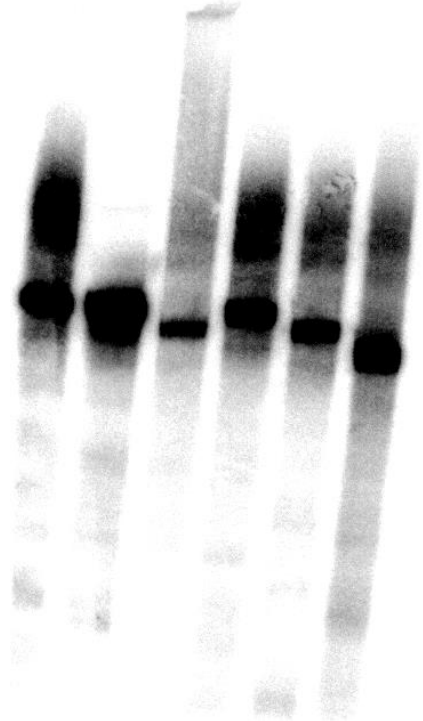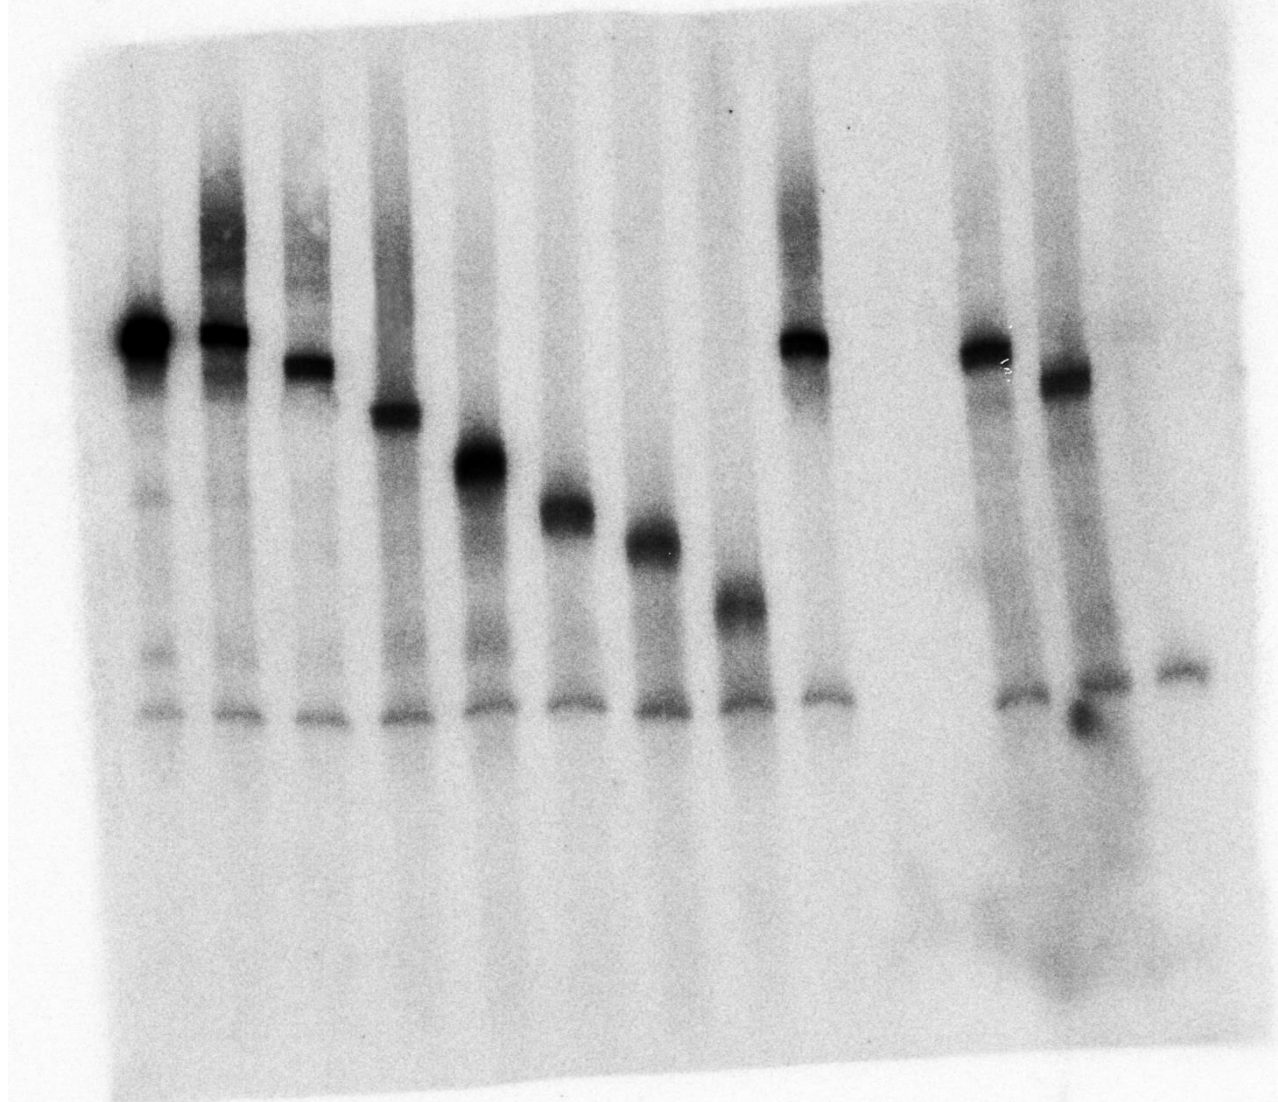

Supplement: s1 [file s1]
